# Supplementary material for: Usual Nutrient Intake Distribution and Prevalence of Nutrient Intake Inadequacy among Japanese Children and Adults: A Nationwide Study Based on 8-Day Dietary Records
Source: MDPI journal article supplement (doi:10.3390/nu15245113), 2023-12-14
Supplement: s1 [file s1]

**Table S1.** Dietary Reference Intakes (2020) for Japanese male children and adolescents <sup>a</sup>.

| Variables                          | 1–2 years | 3–5 years | 6–7 years | 8–9 years | 10–11 years | 12–14 years | 15–17 years |
|------------------------------------|-----------|-----------|-----------|-----------|-------------|-------------|-------------|
| <b>Energy, kcal/d <sup>b</sup></b> |           |           |           |           |             |             |             |
| Physical activity level I          | -         | -         | 1350      | 1600      | 1950        | 2300        | 2500        |
| Physical activity level II         | 950       | 1300      | 1550      | 1850      | 2250        | 2600        | 2800        |
| Physical activity level III        | -         | -         | 1750      | 2100      | 2500        | 2900        | 3150        |
| <b>Nutrients with EAR</b>          |           |           |           |           |             |             |             |
| Protein, g/d                       | 15        | 20        | 25        | 30        | 40          | 50          | 50          |
| Vitamin A, µg RAE/d                | 300       | 350       | 300       | 350       | 450         | 550         | 650         |
| Thiamine, mg/d                     | 0.4       | 0.6       | 0.7       | 0.8       | 1           | 1.2         | 1.3         |
| Riboflavin, mg/d                   | 0.5       | 0.7       | 0.8       | 0.9       | 1.1         | 1.3         | 1.4         |
| Niacin, mg NE/d                    | 5         | 6         | 7         | 9         | 11          | 12          | 14          |
| Vitamin B-6, mg/d                  | 0.4       | 0.5       | 0.7       | 0.8       | 1           | 1.2         | 1.2         |
| Vitamin B-12, µg/d                 | 0.8       | 0.9       | 1.1       | 1.3       | 1.6         | 2           | 2           |
| Folate, µg/d                       | 80        | 90        | 110       | 130       | 160         | 200         | 220         |
| Vitamin C, mg/d                    | 35        | 40        | 50        | 60        | 70          | 85          | 85          |
| Sodium, mg/d                       | -         | -         | -         | -         | -           | -           | -           |
| Calcium, mg/d                      | 350       | 500       | 500       | 550       | 600         | 850         | 650         |
| Magnesium, mg/d                    | 60        | 80        | 110       | 140       | 180         | 250         | 300         |
| Iron, mg/d                         | 3         | 4         | 5         | 6         | 7           | 8           | 8           |
| Zinc, mg/d                         | 3         | 3         | 4         | 5         | 6           | 9           | 10          |
| Copper, mg/d                       | 0.3       | 0.3       | 0.4       | 0.4       | 0.5         | 0.7         | 0.8         |
| <b>Nutrients with DG</b>           |           |           |           |           |             |             |             |
| Protein, % energy                  | 13–20     | 13–20     | 13–20     | 13–20     | 13–20       | 13–20       | 13–20       |
| Fat, % energy                      | 20–30     | 20–30     | 20–30     | 20–30     | 20–30       | 20–30       | 20–30       |
| SFA, % energy                      | -         | ≤10       | ≤10       | ≤10       | ≤10         | ≤10         | ≤8          |
| Carbohydrate, % energy             | 50–65     | 50–65     | 50–65     | 50–65     | 50–65       | 50–65       | 50–65       |
| Dietary fibre, g/d                 | -         | ≥8        | ≥10       | ≥11       | ≥13         | ≥17         | ≥19         |
| Sodium, g salt equivalent/d        | <3        | <3.5      | <4.5      | <5        | <6          | <7          | <7.5        |
| Potassium, mg/d                    | -         | ≥1400     | ≥1800     | ≥2000     | ≥2200       | ≥2400       | ≥3000       |
| <b>Nutrients with AI</b>           |           |           |           |           |             |             |             |
| n-6 PUFA, g/d                      | 4         | 6         | 8         | 8         | 10          | 11          | 13          |
| n-3 PUFA, g/d                      | 0.7       | 1.1       | 1.5       | 1.5       | 1.6         | 1.9         | 2.1         |
| Vitamin D, µg/d                    | 3         | 3.5       | 4.5       | 5         | 6.5         | 8           | 9           |
| Vitamin E, mg/d                    | 3         | 4         | 5         | 5         | 5.5         | 6.5         | 7           |
| Vitamin K, µg/d                    | 50        | 60        | 80        | 90        | 110         | 140         | 160         |
| Pantothenic acid, mg/d             | 3         | 4         | 5         | 6         | 6           | 7           | 7           |
| Potassium, mg/d                    | 900       | 1000      | 1300      | 1500      | 1800        | 2300        | 2700        |
| Phosphorus, mg/d                   | 500       | 700       | 900       | 1000      | 1100        | 1200        | 1200        |
| Manganese, mg/d                    | 1.5       | 1.5       | 2         | 2.5       | 3           | 4           | 4.5         |
| <b>Nutrients with UL</b>           |           |           |           |           |             |             |             |
| Vitamin A, µg RAE/d                | 600       | 700       | 950       | 1200      | 1500        | 2100        | 2500        |
| Vitamin D, µg/d                    | 20        | 30        | 30        | 40        | 60          | 80          | 90          |
| Vitamin E, mg/d                    | 150       | 200       | 300       | 350       | 450         | 650         | 750         |
| Niacin, mg NE/d <sup>c</sup>       | 60 (15)   | 80 (20)   | 100 (30)  | 150 (35)  | 200 (45)    | 250 (60)    | 300 (70)    |
| Vitamin B-6, mg/d                  | 10        | 15        | 20        | 25        | 30          | 40          | 50          |
| Folate, µg/d                       | 200       | 300       | 400       | 500       | 700         | 900         | 900         |
| Calcium, mg/d                      | -         | -         | -         | -         | -           | -           | -           |
| Phosphorus, mg/d                   | -         | -         | -         | -         | -           | -           | -           |
| Iron, mg/d                         | 25        | 25        | 30        | 35        | 35          | 40          | 50          |
| Zinc, mg/d                         | -         | -         | -         | -         | -           | -           | -           |
| Copper, mg/d                       | -         | -         | -         | -         | -           | -           | -           |
| Manganese, mg/d                    | -         | -         | -         | -         | -           | -           | -           |

AI, Adequate Intake; DG, Tentative Dietary Goal for Preventing Lifestyle-related Diseases; EAR, Estimated Average Requirement; SD, standard deviation; SFA, saturated fatty acid; PUFA, polyunsaturated fatty acid. <sup>a</sup> Hyphens indicate the absence of a reference value. <sup>b</sup> The reference values for energy were not considered in this study. <sup>c</sup> The amount of nicotinamide. The values in parentheses are the amount of nicotinic acid.

**Table S2.** Dietary Reference Intakes (2020) for Japanese female children and adolescents <sup>a</sup>.

| Variables                                 | 1–2 years | 3–5 years | 6–7 years | 8–9 years | 10–11 years | 12–14 years | 15–17 years |
|-------------------------------------------|-----------|-----------|-----------|-----------|-------------|-------------|-------------|
| <b>Energy, kcal/d <sup>b</sup></b>        |           |           |           |           |             |             |             |
| Physical activity level I                 | -         | -         | 1250      | 1500      | 1850        | 2150        | 2050        |
| Physical activity level II                | 900       | 1250      | 1450      | 1700      | 2100        | 2400        | 2300        |
| Physical activity level III               | -         | -         | 1650      | 1900      | 2350        | 2700        | 2550        |
| <b>Nutrients with EAR</b>                 |           |           |           |           |             |             |             |
| Protein, g/d                              | 15        | 20        | 25        | 30        | 40          | 45          | 45          |
| Vitamin A, µg RAE/d                       | 250       | 350       | 300       | 350       | 400         | 500         | 500         |
| Thiamine, mg/d                            | 0.4       | 0.6       | 0.7       | 0.8       | 0.9         | 1.1         | 1           |
| Riboflavin, mg/d                          | 0.5       | 0.6       | 0.7       | 0.9       | 1           | 1.2         | 1.2         |
| Niacin, mg NE/d                           | 4         | 6         | 7         | 8         | 10          | 12          | 11          |
| Vitamin B-6, mg/d                         | 0.4       | 0.5       | 0.6       | 0.8       | 1           | 1           | 1           |
| Vitamin B-12, µg/d                        | 0.8       | 0.9       | 1.1       | 1.3       | 1.6         | 2           | 2           |
| Folate, µg/d                              | 90        | 90        | 110       | 130       | 160         | 200         | 200         |
| Vitamin C, mg/d                           | 35        | 40        | 50        | 60        | 70          | 85          | 85          |
| Sodium, mg/d                              | -         | -         | -         | -         | -           | -           | -           |
| Calcium, mg/d                             | 350       | 450       | 450       | 600       | 600         | 700         | 550         |
| Magnesium, mg/d                           | 60        | 80        | 110       | 140       | 180         | 240         | 260         |
| Iron, mg/d (for non-menstruating females) | 3         | 4         | 4.5       | 6         | 7           | 7           | 5.5         |
| Iron, mg/d (for menstruating females)     | -         | -         | -         | -         | 10          | 10          | 8.5         |
| Zinc, mg/d                                | 2         | 3         | 3         | 4         | 5           | 7           | 7           |
| <b>Nutrients with DG</b>                  |           |           |           |           |             |             |             |
| Copper, mg/d                              | ≥0.2      | ≥0.3      | ≥0.4      | ≥0.4      | ≥0.5        | ≥0.6        | ≥0.6        |
| Protein, % energy                         | 13–20     | 13–20     | 13–20     | 13–20     | 13–20       | 13–20       | 13–20       |
| Fat, % energy                             | 20–30     | 20–30     | 20–30     | 20–30     | 20–30       | 20–30       | 20–30       |
| SFA, % energy                             | -         | ≤10       | ≤10       | ≤10       | ≤10         | ≤10         | ≤8          |
| Carbohydrate, % energy                    | 50–65     | 50–65     | 50–65     | 50–65     | 50–65       | 50–65       | 50–65       |
| Dietary fibre, g/d                        | -         | ≥8        | ≥10       | ≥11       | ≥13         | ≥17         | ≥18         |
| Sodium, g salt equivalent/d               | <3        | <3.5      | <4.5      | <5        | <6          | <6.5        | <6.5        |
| <b>Nutrients with AI</b>                  |           |           |           |           |             |             |             |
| Potassium, mg/d                           | -         | 1400      | 1800      | 2000      | 2000        | 2400        | 2600        |
| n-6 PUFA, g/d                             | 4         | 6         | 7         | 7         | 8           | 9           | 9           |
| n-3 PUFA, g/d                             | 0.8       | 1         | 1.3       | 1.3       | 1.6         | 1.6         | 1.6         |
| Vitamin D, µg/d                           | 3.5       | 4         | 5         | 6         | 8           | 9.5         | 8.5         |
| Vitamin E, mg/d                           | 3         | 4         | 5         | 5         | 5.5         | 6           | 5.5         |
| Vitamin K, µg/d                           | 60        | 70        | 90        | 110       | 140         | 170         | 150         |
| Pantothenic acid, mg/d                    | 4         | 4         | 5         | 5         | 6           | 6           | 6           |
| Potassium, mg/d                           | 900       | 1000      | 1200      | 1500      | 1800        | 1900        | 2000        |
| Phosphorus, mg/d                          | 500       | 700       | 800       | 1000      | 1000        | 1000        | 900         |
| <b>Nutrients with UL</b>                  |           |           |           |           |             |             |             |
| Manganese, mg/d                           | 1.5       | 1.5       | 2         | 2.5       | 3           | 4           | 3.5         |
| Vitamin A, µg RAE/d                       | 600       | 850       | 1200      | 1500      | 1900        | 2500        | 2800        |
| Vitamin D, µg/d                           | 20        | 30        | 30        | 40        | 60          | 80          | 90          |
| Vitamin E, mg/d                           | 150       | 200       | 300       | 350       | 450         | 600         | 650         |
| Niacin, mg NE/d <sup>c</sup>              | 60 (15)   | 80 (20)   | 100 (30)  | 150 (35)  | 150 (45)    | 250 (60)    | 250 (65)    |
| Vitamin B-6, mg/d                         | 10        | 15        | 20        | 25        | 30          | 40          | 45          |
| Folate, µg/d                              | 200       | 300       | 400       | 500       | 700         | 900         | 900         |
| Calcium, mg/d                             | -         | -         | -         | -         | -           | -           | -           |
| Phosphorus, mg/d                          | -         | -         | -         | -         | -           | -           | -           |
| Iron, mg/d                                | 20        | 25        | 30        | 35        | 35          | 40          | 40          |
| Zinc, mg/d                                | -         | -         | -         | -         | -           | -           | -           |
| Copper, mg/d                              | -         | -         | -         | -         | -           | -           | -           |
| Manganese, mg/d                           | -         | -         | -         | -         | -           | -           | -           |

AI, Adequate Intake; DG, Tentative Dietary Goal for Preventing Lifestyle-related Diseases; EAR, Estimated Average Requirement; SD, standard deviation; SFA, saturated fatty acid; PUFA, polyunsaturated fatty acid. <sup>a</sup> Hyphens indicate the absence of a reference value. <sup>b</sup> The reference values for energy were not considered in this study. <sup>c</sup> The amount of nicotinamide. The values in parentheses are the amount of nicotinic acid.

**Table S3.** Dietary Reference Intakes (2020) for Japanese male adults <sup>a</sup>.

| Variables                          | 18–29 years | 30–49 years | 50–64 years | 65–74 years | 75–79 years |
|------------------------------------|-------------|-------------|-------------|-------------|-------------|
| <b>Energy, kcal/d <sup>b</sup></b> |             |             |             |             |             |
| Physical activity level I          | 2300        | 2300        | 2200        | 2050        | 1800        |
| Physical activity level II         | 2650        | 2700        | 2600        | 2400        | 2100        |
| Physical activity level III        | 3050        | 3050        | 2950        | 2750        | -           |
| <b>Nutrients with EAR</b>          |             |             |             |             |             |
| Protein, g/d                       | 50          | 50          | 50          | 50          | 50          |
| Vitamin A, µg RAE/d                | 600         | 650         | 650         | 600         | 550         |
| Thiamine, mg/d                     | 1.2         | 1.2         | 1.1         | 1.1         | 1           |
| Riboflavin, mg/d                   | 1.3         | 1.3         | 1.2         | 1.2         | 1.1         |
| Niacin, mg NE/d                    | 13          | 13          | 12          | 12          | 11          |
| Vitamin B-6, mg/d                  | 1.1         | 1.1         | 1.1         | 1.1         | 1.1         |
| Vitamin B-12, µg/d                 | 2           | 2           | 2           | 2           | 2           |
| Folate, µg/d                       | 200         | 200         | 200         | 200         | 200         |
| Vitamin C, mg/d                    | 85          | 85          | 85          | 80          | 80          |
| Sodium, mg/d                       | 600         | 600         | 600         | 600         | 600         |
| Calcium, mg/d                      | 650         | 600         | 600         | 600         | 600         |
| Magnesium, mg/d                    | 280         | 310         | 310         | 290         | 270         |
| Iron, mg/d                         | 6.5         | 6.5         | 6.5         | 6           | 6           |
| Zinc, mg/d                         | 9           | 9           | 9           | 9           | 9           |
| Copper, mg/d                       | 0.7         | 0.7         | 0.7         | 0.7         | 0.7         |
| <b>Nutrients with DG</b>           |             |             |             |             |             |
| Protein, % energy                  | 13–20       | 13–20       | 14–20       | 15–20       | 15–20       |
| Fat, % energy                      | 20–30       | 20–30       | 20–30       | 20–30       | 20–30       |
| SFA, % energy                      | ≤7          | ≤7          | ≤7          | ≤7          | ≤7          |
| Carbohydrate, % energy             | 50–65       | 50–65       | 50–65       | 50–65       | 50–65       |
| Dietary fibre, g/d                 | ≥21         | ≥21         | ≥21         | ≥20         | ≥20         |
| Sodium, g salt equivalent/d        | <7.5        | <7.5        | <7.5        | <7.5        | <7.5        |
| Potassium, mg/d                    | ≥3000       | ≥3000       | ≥3000       | ≥3000       | ≥3000       |
| <b>Nutrients with AI</b>           |             |             |             |             |             |
| n-6 PUFA, g/d                      | 11          | 10          | 10          | 9           | 8           |
| n-3 PUFA, g/d                      | 2           | 2           | 2.2         | 2.2         | 2.1         |
| Vitamin D, µg/d                    | 8.5         | 8.5         | 8.5         | 8.5         | 8.5         |
| Vitamin E, mg/d                    | 6           | 6           | 7           | 7           | 6.5         |
| Vitamin K, µg/d                    | 150         | 150         | 150         | 150         | 150         |
| Pantothenic acid, mg/d             | 5           | 5           | 6           | 6           | 6           |
| Potassium, mg/d                    | 2500        | 2500        | 2500        | 2500        | 2500        |
| Phosphorus, mg/d                   | 1000        | 1000        | 1000        | 1000        | 1000        |
| Manganese, mg/d                    | 4           | 4           | 4           | 4           | 4           |
| <b>Nutrients with UL</b>           |             |             |             |             |             |
| Vitamin A, µg RAE/d                | 2700        | 2700        | 2700        | 2700        | 2700        |
| Vitamin D, µg/d                    | 100         | 100         | 100         | 100         | 100         |
| Vitamin E, mg/d                    | 850         | 900         | 850         | 850         | 750         |
| Niacin, mg NE/d <sup>c</sup>       | 60 (15)     | 350 (85)    | 350 (85)    | 300 (80)    | 300 (75)    |
| Vitamin B-6, mg/d                  | 55          | 60          | 55          | 50          | 50          |
| Folate, µg/d                       | 900         | 1000        | 1000        | 900         | 900         |
| Calcium, mg/d                      | 2500        | 2500        | 2500        | 2500        | 2500        |
| Phosphorus, mg/d                   | 3000        | 3000        | 3000        | 3000        | 3000        |
| Iron, mg/d                         | 50          | 50          | 50          | 50          | 50          |
| Zinc, mg/d                         | 40          | 45          | 45          | 40          | 40          |
| Copper, mg/d                       | 7           | 7           | 7           | 7           | 7           |
| Manganese, mg/d                    | 11          | 11          | 11          | 11          | 11          |

AI, Adequate Intake; DG, Tentative Dietary Goal for Preventing Lifestyle-related Diseases; EAR, Estimated Average Requirement; SD, standard deviation; SFA, saturated fatty acid; PUFA, polyunsaturated fatty acid. <sup>a</sup> Hyphens indicate the absence of a reference value. <sup>b</sup> The reference values for energy were not considered in this study. <sup>c</sup> The amount of nicotinamide. The values in parentheses are the amount of nicotinic acid.

**Table S4.** Dietary Reference Intakes (2020) for Japanese female adults <sup>a</sup>.

| Variables                                 | 18–29 years | 30–49 years | 50–64 years | 65–74 years | 75–79 years |
|-------------------------------------------|-------------|-------------|-------------|-------------|-------------|
| <b>Energy, kcal/d <sup>b</sup></b>        |             |             |             |             |             |
| Physical activity level I                 | 1700        | 1750        | 1650        | 1550        | 1400        |
| Physical activity level II                | 2000        | 2050        | 1950        | 1850        | 1650        |
| Physical activity level III               | 2300        | 2350        | 2250        | 2100        | -           |
| <b>Nutrients with EAR</b>                 |             |             |             |             |             |
| Protein, g/d                              | 40          | 40          | 40          | 40          | 40          |
| Vitamin A, µg RAE/d                       | 450         | 500         | 500         | 500         | 450         |
| Thiamine, mg/d                            | 0.9         | 0.9         | 0.9         | 0.9         | 0.8         |
| Riboflavin, mg/d                          | 1           | 1           | 1           | 1           | 0.9         |
| Niacin, mg NE/d                           | 9           | 10          | 9           | 9           | 9           |
| Vitamin B-6, mg/d                         | 1           | 1           | 1           | 1           | 1           |
| Vitamin B-12, µg/d                        | 2           | 2           | 2           | 2           | 2           |
| Folate, µg/d                              | 200         | 200         | 200         | 200         | 200         |
| Vitamin C, mg/d                           | 85          | 85          | 85          | 80          | 80          |
| Sodium, mg/d                              | 600         | 600         | 600         | 600         | 600         |
| Calcium, mg/d                             | 550         | 550         | 550         | 550         | 500         |
| Magnesium, mg/d                           | 230         | 240         | 240         | 230         | 220         |
| Iron, mg/d (for non-menstruating females) | 5.5         | 5.5         | 5.5         | 5           | 5           |
| Iron, mg/d (for menstruating females)     | 8.5         | 9           | 9           | -           | -           |
| Zinc, mg/d                                | 7           | 7           | 7           | 7           | 6           |
| <b>Nutrients with DG</b>                  |             |             |             |             |             |
| Copper, mg/d                              | ≥0.6        | ≥0.6        | ≥0.6        | ≥0.6        | ≥0.6        |
| Protein, % energy                         | 13–20       | 13–20       | 14–20       | 15–20       | 15–20       |
| Fat, % energy                             | 20–30       | 20–30       | 20–30       | 20–30       | 20–30       |
| SFA, % energy                             | ≤7          | ≤7          | ≤7          | ≤7          | ≤7          |
| Carbohydrate, % energy                    | 50–65       | 50–65       | 50–65       | 50–65       | 50–65       |
| Dietary fibre, g/d                        | ≥18         | ≥18         | ≥18         | ≥17         | ≥17         |
| Sodium, g salt equivalent/d               | <6.5        | <6.5        | <6.5        | <6.5        | <6.5        |
| <b>Nutrients with AI</b>                  |             |             |             |             |             |
| Potassium, mg/d                           | 2600        | 2600        | 2600        | 2600        | 2600        |
| n-6 PUFA, g/d                             | 8           | 8           | 8           | 8           | 7           |
| n-3 PUFA, g/d                             | 1.6         | 1.6         | 1.9         | 2           | 1.8         |
| Vitamin D, µg/d                           | 8.5         | 8.5         | 8.5         | 8.5         | 8.5         |
| Vitamin E, mg/d                           | 5           | 5.5         | 6           | 6.5         | 6.5         |
| Vitamin K, µg/d                           | 150         | 150         | 150         | 150         | 150         |
| Pantothenic acid, mg/d                    | 5           | 5           | 5           | 5           | 5           |
| Potassium, mg/d                           | 2000        | 2000        | 2000        | 2000        | 2000        |
| Phosphorus, mg/d                          | 800         | 800         | 800         | 800         | 800         |
| <b>Nutrients with UL</b>                  |             |             |             |             |             |
| Manganese, mg/d                           | 3.5         | 3.5         | 3.5         | 3.5         | 3.5         |
| Vitamin A, µg RAE/d                       | 2700        | 2700        | 2700        | 2700        | 2700        |
| Vitamin D, µg/d                           | 100         | 100         | 100         | 100         | 100         |
| Vitamin E, mg/d                           | 650         | 700         | 700         | 650         | 650         |
| Niacin, mg NE/d <sup>c</sup>              | 60 (15)     | 250 (65)    | 250 (65)    | 250 (65)    | 250 (60)    |
| Vitamin B-6, mg/d                         | 45          | 45          | 45          | 40          | 40          |
| Folate, µg/d                              | 900         | 1000        | 1000        | 900         | 900         |
| Calcium, mg/d                             | 2500        | 2500        | 2500        | 2500        | 2500        |
| Phosphorus, mg/d                          | 3000        | 3000        | 3000        | 3000        | 3000        |
| Iron, mg/d                                | 40          | 40          | 40          | 40          | 40          |
| Zinc, mg/d                                | 35          | 35          | 35          | 35          | 30          |
| Copper, mg/d                              | 7           | 7           | 7           | 7           | 7           |
| Manganese, mg/d                           | 11          | 11          | 11          | 11          | 11          |

AI, Adequate Intake; DG, Tentative Dietary Goal for Preventing Lifestyle-related Diseases; EAR, Estimated Average Requirement; SD, standard deviation; SFA, saturated fatty acid; PUFA, polyunsaturated fatty acid. <sup>a</sup> Hyphens indicate the absence of a reference value. <sup>b</sup> The reference values for energy were not considered in this study. <sup>c</sup> The amount of nicotinamide. The values in parentheses are the amount of nicotinic acid.

**Table S5.** Usual intake distribution of energy and nutrients among Japanese aged 1-2 years <sup>a</sup>.

| Variables                    | Males (N = 149) |       |       |       |       |       |       |          |          | Females (N = 142) |       |       |       |       |       |       |          |          |
|------------------------------|-----------------|-------|-------|-------|-------|-------|-------|----------|----------|-------------------|-------|-------|-------|-------|-------|-------|----------|----------|
|                              | 5th             | 10th  | 25th  | 50th  | 75th  | 90th  | 95th  | kurtosis | skewness | 5th               | 10th  | 25th  | 50th  | 75th  | 90th  | 95th  | kurtosis | skewness |
| Energy, kcal/d               | 905             | 965   | 1100  | 1197  | 1331  | 1514  | 1599  | 3.22     | 0.17     | 835               | 881   | 1004  | 1078  | 1197  | 1293  | 1385  | 2.96     | 0.07     |
| Nutrients without DRI values |                 |       |       |       |       |       |       |          |          |                   |       |       |       |       |       |       |          |          |
| Fat, g/d                     | 23.5            | 27.6  | 32.0  | 37.4  | 44.0  | 50.7  | 58.6  | 3.59     | 0.64     | 23.9              | 25.6  | 29.1  | 33.8  | 38.6  | 43.9  | 46.8  | 3.22     | 0.19     |
| SFA, g/d                     | 7.0             | 8.4   | 10.5  | 12.2  | 14.3  | 17.5  | 19.2  | 3.37     | 0.52     | 7.5               | 8.0   | 9.2   | 10.6  | 12.9  | 15.0  | 16.4  | 3.38     | 0.50     |
| Carbohydrate, g/d            | 134.9           | 144.0 | 158.2 | 172.4 | 186.7 | 208.9 | 230.5 | 3.57     | 0.26     | 124.0             | 130.3 | 140.3 | 156.4 | 171.7 | 186.5 | 197.9 | 3.54     | 0.24     |
| Nutrients with EAR           |                 |       |       |       |       |       |       |          |          |                   |       |       |       |       |       |       |          |          |
| Protein, g/d                 | 27.8            | 31.5  | 36.7  | 41.5  | 47.5  | 54.2  | 58.3  | 3.29     | 0.24     | 26.6              | 29.4  | 34.8  | 39.2  | 43.8  | 46.7  | 51.3  | 3.20     | 0.04     |
| Vitamin A, µg RAE/d          | 199             | 234   | 299   | 361   | 454   | 520   | 578   | 3.45     | 0.41     | 218               | 255   | 287   | 340   | 440   | 533   | 573   | 3.16     | 0.59     |
| Thiamine, mg/d               | 0.40            | 0.40  | 0.50  | 0.60  | 0.70  | 0.80  | 0.80  | 3.10     | 0.29     | 0.40              | 0.40  | 0.50  | 0.50  | 0.60  | 0.70  | 0.70  | 3.98     | 0.41     |
| Riboflavin, mg/d             | 0.50            | 0.50  | 0.70  | 0.80  | 0.90  | 1.00  | 1.10  | 3.07     | 0.10     | 0.50              | 0.60  | 0.60  | 0.70  | 0.90  | 1.00  | 1.00  | 4.37     | 0.56     |
| Niacin, mg NE/d              | 11.3            | 12.4  | 14.5  | 16.5  | 19.1  | 22.2  | 24.3  | 3.65     | 0.46     | 10.5              | 11.5  | 14.0  | 15.5  | 17.6  | 19.6  | 20.7  | 3.47     | 0.20     |
| Vitamin B-6, mg/d            | 0.50            | 0.60  | 0.70  | 0.80  | 0.90  | 1.00  | 1.20  | 5.56     | 0.87     | 0.50              | 0.50  | 0.60  | 0.70  | 0.80  | 0.90  | 1.00  | 3.62     | 0.38     |
| Vitamin B-12, µg/d           | 1.7             | 1.9   | 2.3   | 2.9   | 3.5   | 4.2   | 4.5   | 3.37     | 0.53     | 1.6               | 1.8   | 2.1   | 2.8   | 3.4   | 3.9   | 4.5   | 3.44     | 0.61     |
| Folate, µg/d                 | 104             | 121   | 141   | 168   | 205   | 233   | 246   | 2.66     | 0.15     | 105               | 116   | 143   | 170   | 197   | 219   | 248   | 3.22     | 0.31     |
| Vitamin C, mg/d              | 34              | 39    | 50    | 61    | 73    | 87    | 94    | 3.16     | 0.34     | 32                | 38    | 48    | 59    | 75    | 86    | 98    | 3.22     | 0.51     |
| Sodium, mg/d                 | 1355            | 1540  | 1840  | 2112  | 2323  | 2639  | 2700  | 3.69     | -0.28    | 1249              | 1400  | 1603  | 1988  | 2254  | 2530  | 2702  | 4.84     | 0.63     |
| Calcium, mg/d                | 240             | 254   | 325   | 403   | 482   | 546   | 586   | 3.41     | 0.40     | 217               | 258   | 305   | 368   | 455   | 542   | 596   | 6.08     | 1.12     |
| Magnesium, mg/d              | 103             | 115   | 129   | 147   | 169   | 188   | 197   | 2.71     | 0.06     | 98                | 106   | 125   | 141   | 155   | 173   | 186   | 4.82     | 0.66     |
| Iron, mg/d                   | 2.8             | 3.0   | 3.5   | 3.9   | 4.7   | 5.5   | 5.7   | 4.35     | 0.72     | 2.8               | 3.0   | 3.3   | 4.0   | 4.3   | 4.8   | 5.0   | 3.36     | 0.28     |
| Zinc, mg/d                   | 3.5             | 3.8   | 4.4   | 5.1   | 6.0   | 6.4   | 7.0   | 3.03     | 0.19     | 3.2               | 3.7   | 4.1   | 4.7   | 5.1   | 5.8   | 6.2   | 3.28     | 0.11     |
| Copper, mg/d                 | 0.40            | 0.50  | 0.60  | 0.60  | 0.70  | 0.80  | 0.90  | 3.38     | 0.46     | 0.40              | 0.50  | 0.50  | 0.60  | 0.70  | 0.70  | 0.80  | 3.50     | 0.11     |
| Nutrients with DG            |                 |       |       |       |       |       |       |          |          |                   |       |       |       |       |       |       |          |          |
| Protein, % energy            | 11.6            | 12.1  | 13.1  | 13.8  | 14.7  | 15.7  | 16.0  | 4.51     | -0.63    | 12.2              | 12.4  | 13.5  | 14.6  | 15.2  | 15.8  | 16.5  | 3.33     | -0.21    |
| Fat, % energy                | 22.0            | 23.0  | 25.8  | 28.1  | 30.3  | 33.1  | 34.4  | 3.65     | 0.09     | 22.4              | 23.7  | 25.4  | 27.4  | 29.8  | 31.7  | 32.4  | 3.82     | -0.30    |
| SFA, % energy                | 6.4             | 7.1   | 8.1   | 9.2   | 10.2  | 11.1  | 11.6  | 3.03     | -0.08    | 6.5               | 7.1   | 7.9   | 8.9   | 9.9   | 10.8  | 11.2  | 3.41     | 0.09     |
| Carbohydrate, % energy       | 49.7            | 51.8  | 55.5  | 58.2  | 60.8  | 63.7  | 66.5  | 3.20     | -0.03    | 51.5              | 53.0  | 55.3  | 58.0  | 60.2  | 62.0  | 64.6  | 3.92     | 0.36     |
| Dietary fibre, g/d           | 7.4             | 8.4   | 9.6   | 10.6  | 12.9  | 14.4  | 15.4  | 3.54     | 0.43     | 7.0               | 7.6   | 9.1   | 10.6  | 11.7  | 13.2  | 14.2  | 3.51     | 0.29     |
| Sodium, g salt equivalent/   | 3.4             | 3.9   | 4.7   | 5.4   | 5.9   | 6.7   | 6.9   | 3.69     | -0.28    | 3.2               | 3.6   | 4.1   | 5.0   | 5.7   | 6.4   | 6.9   | 4.84     | 0.63     |
| Potassium, mg/d              | 1052            | 1184  | 1361  | 1531  | 1781  | 1957  | 2086  | 3.49     | 0.17     | 1002              | 1109  | 1270  | 1470  | 1669  | 1825  | 1953  | 4.16     | 0.54     |
| Nutrients with AI            |                 |       |       |       |       |       |       |          |          |                   |       |       |       |       |       |       |          |          |
| n-6 PUFA, g/d                | 3.40            | 3.80  | 4.50  | 5.50  | 6.30  | 7.30  | 8.30  | 4.66     | 0.88     | 3.40              | 3.60  | 4.40  | 5.00  | 5.70  | 6.40  | 6.80  | 2.85     | 0.13     |
| n-3 PUFA, g/d                | 0.50            | 0.60  | 0.70  | 0.90  | 1.10  | 1.30  | 1.50  | 3.05     | 0.57     | 0.50              | 0.60  | 0.70  | 0.90  | 1.00  | 1.30  | 1.30  | 3.16     | 0.55     |
| Vitamin D, µg/d              | 1.7             | 2.1   | 2.8   | 3.5   | 4.7   | 5.5   | 6.1   | 3.10     | 0.62     | 2.0               | 2.3   | 2.7   | 3.6   | 4.3   | 5.3   | 5.6   | 2.56     | 0.32     |
| Vitamin E, mg/d              | 2.8             | 3.3   | 3.9   | 4.4   | 5.2   | 5.7   | 6.3   | 9.09     | 1.40     | 2.6               | 2.8   | 3.5   | 4.1   | 4.7   | 5.2   | 5.7   | 2.91     | 0.18     |
| Vitamin K, µg/d              | 50              | 70    | 94    | 120   | 156   | 201   | 235   | 4.32     | 0.97     | 65                | 72    | 97    | 129   | 163   | 196   | 222   | 6.04     | 1.24     |
| Pantothenic acid, mg/d       | 2.60            | 2.80  | 3.40  | 3.80  | 4.50  | 5.10  | 5.30  | 2.80     | 0.11     | 2.60              | 2.80  | 3.30  | 3.60  | 4.10  | 4.50  | 4.90  | 3.73     | 0.31     |
| Potassium, mg/d              | 1052            | 1184  | 1361  | 1531  | 1781  | 1957  | 2086  | 3.49     | 0.17     | 1002              | 1109  | 1270  | 1470  | 1669  | 1825  | 1953  | 4.16     | 0.54     |
| Phosphorus, mg/d             | 409             | 495   | 565   | 669   | 758   | 876   | 907   | 2.83     | 0.06     | 428               | 460   | 554   | 624   | 702   | 786   | 814   | 3.95     | 0.41     |
| Manganese, mg/d              | 1.10            | 1.20  | 1.40  | 1.60  | 1.80  | 2.20  | 2.40  | 3.31     | 0.62     | 1.00              | 1.10  | 1.30  | 1.50  | 1.70  | 1.80  | 2.10  | 3.89     | 0.51     |

AI, Adequate Intake; DG, Tentative Dietary Goal for Preventing Lifestyle-related Diseases; DRIs, Dietary Reference Intakes; EAR, Estimated Average Requirement; NE, niacin equivalent; SFA, saturated fatty acid; PUFA, polyunsaturated fatty acid; RAE, retinol active equivalent. <sup>a</sup> Usual intake was estimated using the Multiple Source Method based on 8-day weighed dietary-record data.

**Table S6.** Usual intake distribution of energy and nutrients among Japanese aged 3–5 years <sup>a</sup>.

| Variables                           | Males (N = 225) |       |       |       |       |       |       |          |          | Females (N = 217) |       |       |       |       |       |       |          |          |
|-------------------------------------|-----------------|-------|-------|-------|-------|-------|-------|----------|----------|-------------------|-------|-------|-------|-------|-------|-------|----------|----------|
|                                     | 5th             | 10th  | 25th  | 50th  | 75th  | 90th  | 95th  | kurtosis | skewness | 5th               | 10th  | 25th  | 50th  | 75th  | 90th  | 95th  | kurtosis | skewness |
| <b>Energy, kcal/d</b>               | 1149            | 1234  | 1343  | 1455  | 1597  | 1738  | 1808  | 3.17     | 0.34     | 1056              | 1087  | 1227  | 1367  | 1486  | 1602  | 1695  | 3.16     | 0.38     |
| <b>Nutrients without DRI values</b> |                 |       |       |       |       |       |       |          |          |                   |       |       |       |       |       |       |          |          |
| Fat, g/d                            | 37.8            | 39.9  | 44.6  | 49.7  | 55.2  | 61.4  | 63.7  | 2.88     | 0.36     | 32.3              | 33.8  | 39.5  | 46.2  | 51.6  | 57.6  | 62.1  | 3.01     | 0.34     |
| SFA, g/d                            | 11.7            | 12.3  | 13.8  | 15.9  | 17.8  | 20.3  | 21.2  | 3.59     | 0.55     | 9.4               | 10.5  | 12.4  | 14.4  | 16.4  | 19.1  | 20.1  | 3.45     | 0.42     |
| Carbohydrate, g/d                   | 155.2           | 170.7 | 183.8 | 200.9 | 219.4 | 236.3 | 250.4 | 3.41     | 0.31     | 149.1             | 155.1 | 171.4 | 184.7 | 202.1 | 224.9 | 232.5 | 3.30     | 0.47     |
| <b>Nutrients with EAR</b>           |                 |       |       |       |       |       |       |          |          |                   |       |       |       |       |       |       |          |          |
| Protein, g/d                        | 40.0            | 41.7  | 45.9  | 52.0  | 57.5  | 65.1  | 68.5  | 3.20     | 0.58     | 35.4              | 37.2  | 42.1  | 48.0  | 53.4  | 59.2  | 61.5  | 2.76     | 0.14     |
| Vitamin A, µg RAE/d                 | 238             | 280   | 340   | 405   | 475   | 567   | 620   | 4.66     | 0.83     | 223               | 274   | 337   | 393   | 464   | 548   | 622   | 4.94     | 0.92     |
| Thiamine, mg/d                      | 0.60            | 0.60  | 0.70  | 0.70  | 0.80  | 0.90  | 1.00  | 3.03     | 0.34     | 0.50              | 0.50  | 0.60  | 0.70  | 0.80  | 0.90  | 0.90  | 3.26     | 0.33     |
| Riboflavin, mg/d                    | 0.70            | 0.70  | 0.80  | 0.90  | 1.10  | 1.30  | 1.40  | 5.95     | 1.26     | 0.60              | 0.60  | 0.70  | 0.90  | 1.00  | 1.10  | 1.20  | 3.60     | 0.49     |
| Niacin, mg NE/d                     | 16.0            | 16.8  | 18.3  | 21.1  | 23.7  | 25.7  | 27.5  | 2.76     | 0.39     | 14.3              | 15.1  | 16.8  | 19.8  | 22.3  | 24.5  | 25.5  | 2.92     | 0.27     |
| Vitamin B-6, mg/d                   | 0.60            | 0.70  | 0.80  | 0.90  | 1.00  | 1.10  | 1.20  | 3.14     | 0.59     | 0.60              | 0.60  | 0.70  | 0.90  | 1.00  | 1.10  | 1.10  | 3.46     | 0.28     |
| Vitamin B-12, µg/d                  | 2.2             | 2.6   | 3.0   | 3.6   | 4.4   | 5.3   | 5.8   | 3.15     | 0.65     | 2.0               | 2.3   | 2.8   | 3.4   | 4.0   | 4.7   | 5.4   | 3.83     | 0.68     |
| Folate, µg/d                        | 131             | 144   | 166   | 196   | 234   | 277   | 295   | 3.25     | 0.61     | 127               | 139   | 161   | 192   | 223   | 254   | 269   | 3.83     | 0.43     |
| Vitamin C, mg/d                     | 40              | 46    | 57    | 68    | 84    | 101   | 113   | 4.93     | 0.97     | 38                | 45    | 55    | 69    | 85    | 96    | 103   | 3.45     | 0.26     |
| Sodium, mg/d                        | 1742            | 1941  | 2214  | 2545  | 2903  | 3245  | 3451  | 3.84     | 0.50     | 1676              | 1802  | 2118  | 2433  | 2790  | 3209  | 3292  | 3.37     | 0.37     |
| Calcium, mg/d                       | 277             | 329   | 395   | 472   | 567   | 669   | 757   | 6.06     | 1.20     | 245               | 274   | 341   | 421   | 488   | 571   | 629   | 4.93     | 0.90     |
| Magnesium, mg/d                     | 128             | 135   | 151   | 171   | 196   | 230   | 241   | 3.27     | 0.67     | 114               | 127   | 141   | 163   | 182   | 201   | 211   | 3.45     | 0.31     |
| Iron, mg/d                          | 3.4             | 3.7   | 4.2   | 4.9   | 5.6   | 6.2   | 6.8   | 3.07     | 0.44     | 3.3               | 3.5   | 4.0   | 4.6   | 5.3   | 5.8   | 6.4   | 6.32     | 0.92     |
| Zinc, mg/d                          | 4.8             | 5.1   | 5.6   | 6.3   | 7.1   | 7.8   | 8.5   | 3.32     | 0.56     | 4.1               | 4.5   | 5.1   | 5.8   | 6.5   | 7.1   | 7.6   | 2.67     | 0.14     |
| Copper, mg/d                        | 0.60            | 0.60  | 0.70  | 0.70  | 0.90  | 1.00  | 1.00  | 3.10     | 0.49     | 0.50              | 0.60  | 0.60  | 0.70  | 0.80  | 0.90  | 0.90  | 3.15     | 0.42     |
| <b>Nutrients with DG</b>            |                 |       |       |       |       |       |       |          |          |                   |       |       |       |       |       |       |          |          |
| Protein, % energy                   | 12.6            | 13.0  | 13.5  | 14.3  | 14.9  | 15.7  | 15.9  | 2.71     | 0.07     | 12.3              | 12.7  | 13.5  | 14.2  | 14.9  | 15.6  | 16.0  | 3.16     | -0.11    |
| Fat, % energy                       | 25.9            | 27.0  | 28.8  | 30.1  | 31.7  | 33.3  | 34.6  | 2.85     | -0.07    | 24.3              | 25.8  | 28.0  | 30.0  | 32.2  | 33.9  | 34.9  | 2.69     | -0.14    |
| SFA, % energy                       | 7.5             | 7.9   | 8.9   | 9.7   | 10.5  | 11.3  | 11.8  | 2.68     | -0.09    | 7.2               | 7.8   | 8.7   | 9.6   | 10.3  | 11.2  | 11.7  | 3.80     | 0.01     |
| Carbohydrate, % energy              | 51.0            | 51.7  | 53.6  | 55.4  | 57.1  | 59.0  | 60.6  | 2.99     | 0.16     | 50.0              | 51.3  | 53.4  | 55.4  | 58.1  | 61.1  | 62.3  | 2.94     | 0.31     |
| Dietary fibre, g/d                  | 9.4             | 10.3  | 11.6  | 13.4  | 14.8  | 16.5  | 17.9  | 3.59     | 0.58     | 9.1               | 9.7   | 10.9  | 12.5  | 14.1  | 16.0  | 16.9  | 4.28     | 0.31     |
| Sodium, g salt equivalent           | 4.4             | 4.9   | 5.6   | 6.5   | 7.4   | 8.2   | 8.8   | 3.84     | 0.50     | 4.3               | 4.6   | 5.4   | 6.2   | 7.1   | 8.2   | 8.4   | 3.37     | 0.37     |
| Potassium, mg/d                     | 1356            | 1438  | 1571  | 1795  | 2044  | 2275  | 2549  | 3.86     | 0.74     | 1177              | 1300  | 1450  | 1703  | 1925  | 2116  | 2257  | 3.46     | 0.35     |
| <b>Nutrients with AI</b>            |                 |       |       |       |       |       |       |          |          |                   |       |       |       |       |       |       |          |          |
| n-6 PUFA, g/d                       | 5.00            | 5.40  | 6.20  | 7.10  | 8.20  | 9.10  | 9.60  | 3.25     | 0.36     | 4.60              | 5.00  | 5.70  | 6.60  | 7.50  | 8.40  | 9.00  | 2.71     | 0.13     |
| n-3 PUFA, g/d                       | 0.80            | 0.90  | 1.10  | 1.30  | 1.50  | 1.70  | 1.80  | 3.38     | 0.60     | 0.70              | 0.80  | 0.90  | 1.20  | 1.40  | 1.50  | 1.60  | 3.47     | 0.19     |
| Vitamin D, µg/d                     | 2.2             | 2.5   | 3.0   | 4.0   | 5.1   | 6.1   | 6.7   | 4.19     | 0.77     | 2.2               | 2.6   | 3.2   | 4.2   | 5.4   | 6.2   | 7.2   | 6.39     | 1.10     |
| Vitamin E, mg/d                     | 4.0             | 4.2   | 4.6   | 5.3   | 6.1   | 6.7   | 7.1   | 5.58     | 0.80     | 3.5               | 3.9   | 4.4   | 5.1   | 6.0   | 6.5   | 7.0   | 2.63     | 0.18     |
| Vitamin K, µg/d                     | 84              | 92    | 110   | 140   | 187   | 232   | 277   | 5.77     | 1.41     | 67                | 78    | 104   | 130   | 164   | 203   | 251   | 4.98     | 1.11     |
| Pantothenic acid, mg/d              | 3.50            | 3.60  | 4.10  | 4.60  | 5.20  | 5.80  | 6.30  | 5.00     | 1.04     | 3.00              | 3.30  | 3.80  | 4.20  | 4.80  | 5.30  | 5.80  | 3.19     | 0.36     |
| Potassium, mg/d                     | 1356            | 1438  | 1571  | 1795  | 2044  | 2275  | 2549  | 3.86     | 0.74     | 1177              | 1300  | 1450  | 1703  | 1925  | 2116  | 2257  | 3.46     | 0.35     |
| Phosphorus, mg/d                    | 586             | 648   | 717   | 805   | 901   | 1008  | 1073  | 4.31     | 0.81     | 525               | 554   | 659   | 746   | 826   | 912   | 991   | 3.07     | 0.25     |
| Manganese, mg/d                     | 1.30            | 1.40  | 1.70  | 1.90  | 2.20  | 2.50  | 2.70  | 3.13     | 0.50     | 1.30              | 1.40  | 1.60  | 1.80  | 2.10  | 2.30  | 2.60  | 3.13     | 0.47     |

AI, Adequate Intake; DG, Tentative Dietary Goal for Preventing Lifestyle-related Diseases; DRIs, Dietary Reference Intakes; EAR, Estimated Average Requirement; NE, niacin equivalent; SFA, saturated fatty acid; PUFA, polyunsaturated fatty acid; RAE, retinol active equivalent. <sup>a</sup> Usual intake was estimated using the Multiple Source Method based on 8-day weighed dietary-record data.

**Table S7.** Usual intake distribution of energy and nutrients among Japanese aged 6–7 years <sup>a</sup>.

| Variables                           | Males (N = 98) |       |       |       |       |       |       |          |          | Females (N = 108) |       |       |       |       |       |       |          |          |
|-------------------------------------|----------------|-------|-------|-------|-------|-------|-------|----------|----------|-------------------|-------|-------|-------|-------|-------|-------|----------|----------|
|                                     | 5th            | 10th  | 25th  | 50th  | 75th  | 90th  | 95th  | kurtosis | skewness | 5th               | 10th  | 25th  | 50th  | 75th  | 90th  | 95th  | kurtosis | skewness |
| <b>Energy, kcal/d</b>               | 1408           | 1482  | 1612  | 1712  | 1835  | 1947  | 1982  | 3.11     | 0.02     | 1274              | 1329  | 1437  | 1574  | 1739  | 1877  | 1920  | 3.05     | 0.30     |
| <b>Nutrients without DRI values</b> |                |       |       |       |       |       |       |          |          |                   |       |       |       |       |       |       |          |          |
| Fat, g/d                            | 45.1           | 49.0  | 53.0  | 58.1  | 64.8  | 70.6  | 77.5  | 3.35     | 0.21     | 41.3              | 44.1  | 49.2  | 54.0  | 63.2  | 67.8  | 72.0  | 2.86     | 0.43     |
| SFA, g/d                            | 14.1           | 15.7  | 17.1  | 19.1  | 21.1  | 23.7  | 24.5  | 3.27     | -0.04    | 13.5              | 13.9  | 15.6  | 17.6  | 20.8  | 22.9  | 25.2  | 3.34     | 0.65     |
| Carbohydrate, g/d                   | 194.4          | 200.6 | 214.2 | 235.8 | 251.5 | 266.1 | 273.1 | 2.74     | 0.03     | 175.1             | 180.4 | 195.8 | 212.4 | 233.6 | 254.4 | 260.8 | 2.78     | 0.36     |
| <b>Nutrients with EAR</b>           |                |       |       |       |       |       |       |          |          |                   |       |       |       |       |       |       |          |          |
| Protein, g/d                        | 48.8           | 51.3  | 56.2  | 61.0  | 65.5  | 71.6  | 75.5  | 3.43     | 0.03     | 42.9              | 45.5  | 50.8  | 57.1  | 63.7  | 70.1  | 71.4  | 2.50     | 0.04     |
| Vitamin A, µg RAE/d                 | 267            | 299   | 378   | 428   | 495   | 547   | 623   | 3.04     | -0.05    | 326               | 356   | 393   | 450   | 505   | 577   | 654   | 4.99     | 0.77     |
| Thiamine, mg/d                      | 0.70           | 0.70  | 0.80  | 0.90  | 1.00  | 1.10  | 1.10  | 3.00     | 0.40     | 0.60              | 0.70  | 0.70  | 0.80  | 0.90  | 1.00  | 1.10  | 3.22     | 0.51     |
| Riboflavin, mg/d                    | 0.80           | 0.80  | 1.00  | 1.10  | 1.20  | 1.30  | 1.40  | 3.08     | 0.37     | 0.80              | 0.80  | 0.90  | 1.00  | 1.20  | 1.30  | 1.40  | 2.88     | 0.35     |
| Niacin, mg NE/d                     | 19.0           | 19.8  | 22.9  | 24.8  | 27.7  | 31.2  | 32.3  | 3.15     | 0.08     | 16.5              | 17.9  | 20.4  | 23.2  | 25.9  | 28.7  | 29.8  | 2.96     | 0.28     |
| Vitamin B-6, mg/d                   | 0.80           | 0.80  | 0.90  | 1.00  | 1.10  | 1.30  | 1.40  | 3.35     | 0.17     | 0.70              | 0.70  | 0.80  | 0.90  | 1.10  | 1.20  | 1.20  | 2.64     | 0.25     |
| Vitamin B-12, µg/d                  | 2.9            | 3.1   | 3.5   | 4.2   | 5.0   | 6.1   | 6.6   | 2.68     | 0.64     | 2.6               | 3.0   | 3.4   | 4.2   | 5.1   | 5.9   | 6.3   | 9.00     | 1.59     |
| Folate, µg/d                        | 153            | 166   | 189   | 220   | 249   | 272   | 298   | 3.58     | 0.46     | 147               | 175   | 196   | 218   | 251   | 286   | 304   | 4.28     | 0.64     |
| Vitamin C, mg/d                     | 36             | 46    | 57    | 71    | 86    | 101   | 108   | 2.90     | 0.30     | 45                | 48    | 59    | 71    | 87    | 101   | 121   | 3.68     | 0.78     |
| Sodium, mg/d                        | 2237           | 2485  | 2654  | 2992  | 3507  | 3727  | 4099  | 2.93     | 0.51     | 2212              | 2340  | 2630  | 2925  | 3257  | 3552  | 3814  | 3.97     | 0.40     |
| Calcium, mg/d                       | 339            | 388   | 447   | 517   | 599   | 704   | 757   | 3.42     | 0.48     | 329               | 370   | 422   | 509   | 593   | 697   | 748   | 3.15     | 0.60     |
| Magnesium, mg/d                     | 143            | 157   | 172   | 196   | 216   | 239   | 252   | 3.40     | 0.30     | 135               | 140   | 161   | 194   | 209   | 232   | 250   | 3.19     | 0.29     |
| Iron, mg/d                          | 4.0            | 4.4   | 4.9   | 5.5   | 6.2   | 7.2   | 7.7   | 2.90     | 0.48     | 4.1               | 4.4   | 5.0   | 5.5   | 6.1   | 6.8   | 7.5   | 3.52     | 0.46     |
| Zinc, mg/d                          | 6.0            | 6.3   | 6.8   | 7.4   | 8.1   | 8.8   | 9.2   | 2.91     | 0.26     | 5.1               | 5.5   | 6.1   | 7.0   | 7.7   | 8.3   | 9.0   | 2.66     | 0.20     |
| Copper, mg/d                        | 0.60           | 0.70  | 0.80  | 0.90  | 1.00  | 1.10  | 1.10  | 2.49     | 0.23     | 0.60              | 0.70  | 0.70  | 0.80  | 0.90  | 1.00  | 1.10  | 2.98     | 0.18     |
| <b>Nutrients with DG</b>            |                |       |       |       |       |       |       |          |          |                   |       |       |       |       |       |       |          |          |
| Protein, % energy                   | 12.4           | 12.8  | 13.3  | 14.3  | 14.9  | 15.7  | 16.4  | 2.85     | 0.15     | 12.8              | 13.1  | 13.7  | 14.5  | 15.1  | 15.8  | 16.1  | 3.46     | 0.36     |
| Fat, % energy                       | 24.4           | 26.5  | 28.7  | 31.3  | 33.2  | 34.2  | 35.1  | 2.77     | -0.44    | 27.6              | 27.9  | 29.5  | 31.3  | 32.7  | 34.5  | 35.7  | 3.18     | 0.28     |
| SFA, % energy                       | 7.8            | 8.4   | 9.2   | 10.0  | 11.0  | 11.9  | 12.4  | 3.04     | -0.11    | 8.2               | 8.8   | 9.3   | 10.1  | 10.9  | 12.1  | 12.5  | 2.71     | 0.37     |
| Carbohydrate, % energy              | 50.4           | 51.0  | 52.5  | 54.4  | 56.7  | 59.9  | 61.2  | 2.88     | 0.46     | 48.0              | 49.4  | 52.0  | 54.1  | 56.6  | 58.8  | 59.5  | 2.73     | -0.15    |
| Dietary fibre, g/d                  | 11.6           | 11.8  | 13.4  | 15.1  | 17.1  | 18.3  | 18.7  | 3.29     | 0.32     | 11.4              | 12.0  | 13.0  | 15.0  | 16.2  | 17.8  | 18.8  | 3.32     | 0.29     |
| Sodium, g salt equivalent           | 5.7            | 6.3   | 6.7   | 7.6   | 8.9   | 9.5   | 10.4  | 2.93     | 0.51     | 5.6               | 5.9   | 6.7   | 7.4   | 8.3   | 9.0   | 9.7   | 3.97     | 0.40     |
| Potassium, mg/d                     | 1540           | 1582  | 1767  | 2014  | 2227  | 2388  | 2556  | 2.75     | 0.00     | 1425              | 1469  | 1710  | 1943  | 2129  | 2389  | 2571  | 3.57     | 0.44     |
| <b>Nutrients with AI</b>            |                |       |       |       |       |       |       |          |          |                   |       |       |       |       |       |       |          |          |
| n-6 PUFA, g/d                       | 6.30           | 6.80  | 7.60  | 8.20  | 9.20  | 10.10 | 11.30 | 4.91     | 0.88     | 5.70              | 6.20  | 6.90  | 8.00  | 8.70  | 10.10 | 10.40 | 2.91     | 0.37     |
| n-3 PUFA, g/d                       | 0.90           | 1.00  | 1.10  | 1.40  | 1.70  | 1.90  | 2.10  | 3.65     | 0.68     | 0.80              | 0.90  | 1.10  | 1.30  | 1.50  | 1.80  | 2.00  | 2.76     | 0.39     |
| Vitamin D, µg/d                     | 2.8            | 3.6   | 4.0   | 5.0   | 5.9   | 6.7   | 7.6   | 2.73     | 0.22     | 2.9               | 3.2   | 3.8   | 4.6   | 5.4   | 6.5   | 7.0   | 2.95     | 0.50     |
| Vitamin E, mg/d                     | 4.5            | 4.8   | 5.5   | 6.0   | 6.6   | 7.1   | 7.9   | 6.44     | 0.91     | 4.1               | 4.3   | 4.9   | 5.7   | 6.5   | 7.3   | 7.6   | 2.28     | 0.19     |
| Vitamin K, µg/d                     | 102            | 107   | 114   | 143   | 173   | 221   | 263   | 6.91     | 1.56     | 87                | 99    | 126   | 152   | 186   | 226   | 238   | 3.68     | 0.64     |
| Pantothenic acid, mg/d              | 4.10           | 4.30  | 4.70  | 5.20  | 5.70  | 6.20  | 6.40  | 3.61     | 0.22     | 3.60              | 3.90  | 4.30  | 4.90  | 5.60  | 6.30  | 6.60  | 2.76     | 0.26     |
| Potassium, mg/d                     | 1540           | 1582  | 1767  | 2014  | 2227  | 2388  | 2556  | 2.75     | 0.00     | 1425              | 1469  | 1710  | 1943  | 2129  | 2389  | 2571  | 3.57     | 0.44     |
| Phosphorus, mg/d                    | 716            | 780   | 852   | 930   | 1014  | 1118  | 1146  | 3.45     | -0.01    | 637               | 689   | 762   | 887   | 988   | 1073  | 1124  | 2.80     | 0.16     |
| Manganese, mg/d                     | 1.70           | 1.80  | 2.10  | 2.20  | 2.60  | 2.80  | 2.90  | 2.37     | 0.13     | 1.60              | 1.70  | 1.90  | 2.20  | 2.40  | 2.80  | 3.00  | 3.53     | 0.59     |

AI, Adequate Intake; DG, Tentative Dietary Goal for Preventing Lifestyle-related Diseases; DRIs, Dietary Reference Intakes; EAR, Estimated Average Requirement; NE, niacin equivalent; SFA, saturated fatty acid; PUFA, polyunsaturated fatty acid; RAE, retinol active equivalent. <sup>a</sup> Usual intake was estimated using the Multiple Source Method based on 8-day weighed dietary-record data.

**Table S8.** Usual intake distribution of energy and nutrients among Japanese aged 8–9 years <sup>a</sup>.

| Variables                    | Males (N = 63) |       |       |       |       |       |       |          |          |       | Females (N = 72) |       |       |       |       |       |          |          |  |
|------------------------------|----------------|-------|-------|-------|-------|-------|-------|----------|----------|-------|------------------|-------|-------|-------|-------|-------|----------|----------|--|
|                              | 5th            | 10th  | 25th  | 50th  | 75th  | 90th  | 95th  | kurtosis | skewness | 5th   | 10th             | 25th  | 50th  | 75th  | 90th  | 95th  | kurtosis | skewness |  |
| Energy, kcal/d               | 1651           | 1683  | 1774  | 1975  | 2176  | 2343  | 2551  | 3.51     | 0.73     | 1424  | 1501             | 1645  | 1785  | 1895  | 2030  | 2146  | 6.64     | 1.30     |  |
| Nutrients without DRI values |                |       |       |       |       |       |       |          |          |       |                  |       |       |       |       |       |          |          |  |
| Fat, g/d                     | 51.4           | 53.1  | 59.4  | 69.8  | 79.1  | 89.8  | 94.7  | 2.75     | 0.56     | 49.2  | 51.8             | 55.5  | 59.6  | 68.3  | 77.1  | 82.7  | 5.28     | 1.22     |  |
| SFA, g/d                     | 16.7           | 17.5  | 19.5  | 22.0  | 25.2  | 29.5  | 30.0  | 2.48     | 0.39     | 15.0  | 16.1             | 17.0  | 18.9  | 22.2  | 25.1  | 27.5  | 4.77     | 0.90     |  |
| Carbohydrate, g/d            | 220.8          | 224.7 | 237.3 | 260.9 | 292.1 | 319.4 | 326.3 | 3.76     | 0.79     | 192.1 | 206.5            | 219.5 | 241.3 | 259.4 | 282.8 | 320.6 | 4.88     | 0.93     |  |
| Nutrients with EAR           |                |       |       |       |       |       |       |          |          |       |                  |       |       |       |       |       |          |          |  |
| Protein, g/d                 | 51.2           | 55.5  | 63.8  | 70.2  | 79.5  | 85.9  | 90.8  | 3.44     | 0.35     | 48.0  | 53.4             | 57.8  | 62.7  | 68.7  | 76.6  | 81.0  | 6.07     | 1.21     |  |
| Vitamin A, µg RAE/d          | 369            | 386   | 418   | 502   | 586   | 666   | 740   | 2.74     | 0.52     | 335   | 361              | 405   | 485   | 565   | 613   | 691   | 3.74     | 0.70     |  |
| Thiamine, mg/d               | 0.80           | 0.80  | 0.90  | 1.00  | 1.20  | 1.30  | 1.40  | 2.68     | 0.40     | 0.70  | 0.80             | 0.80  | 0.90  | 1.00  | 1.10  | 1.20  | 4.18     | 0.85     |  |
| Riboflavin, mg/d             | 0.90           | 1.00  | 1.20  | 1.30  | 1.40  | 1.50  | 1.60  | 3.22     | 0.15     | 0.90  | 0.90             | 1.00  | 1.20  | 1.30  | 1.40  | 1.50  | 4.14     | 0.66     |  |
| Niacin, mg NE/d              | 20.7           | 22.7  | 25.2  | 28.9  | 32.8  | 37.0  | 38.5  | 4.19     | 0.54     | 19.1  | 20.7             | 23.5  | 25.7  | 28.3  | 32.5  | 35.8  | 5.15     | 1.09     |  |
| Vitamin B-6, mg/d            | 0.90           | 0.90  | 1.00  | 1.20  | 1.30  | 1.50  | 1.60  | 7.06     | 1.39     | 0.70  | 0.80             | 0.90  | 1.00  | 1.20  | 1.30  | 1.50  | 3.87     | 0.71     |  |
| Vitamin B-12, µg/d           | 3.4            | 3.6   | 4.2   | 5.3   | 6.5   | 7.7   | 9.0   | 3.53     | 0.83     | 2.8   | 3.1              | 3.6   | 4.4   | 5.5   | 6.6   | 7.4   | 7.08     | 1.47     |  |
| Folate, µg/d                 | 200            | 213   | 233   | 265   | 288   | 302   | 325   | 2.87     | 0.25     | 151   | 177              | 207   | 244   | 282   | 333   | 374   | 3.24     | 0.61     |  |
| Vitamin C, mg/d              | 57             | 63    | 70    | 78    | 90    | 99    | 106   | 2.71     | 0.11     | 43    | 49               | 63    | 79    | 96    | 117   | 140   | 6.07     | 1.35     |  |
| Sodium, mg/d                 | 2756           | 2915  | 3237  | 3622  | 3953  | 4442  | 4640  | 2.94     | 0.28     | 2648  | 2842             | 3179  | 3396  | 3695  | 4043  | 4354  | 5.75     | 1.04     |  |
| Calcium, mg/d                | 467            | 480   | 535   | 599   | 720   | 792   | 831   | 2.84     | 0.52     | 372   | 419              | 481   | 544   | 617   | 662   | 735   | 4.79     | 0.81     |  |
| Magnesium, mg/d              | 183            | 188   | 196   | 234   | 252   | 270   | 286   | 2.38     | 0.22     | 152   | 166              | 187   | 210   | 236   | 263   | 291   | 3.23     | 0.55     |  |
| Iron, mg/d                   | 4.8            | 5.1   | 5.7   | 6.6   | 7.4   | 8.2   | 8.7   | 2.62     | 0.27     | 4.4   | 4.7              | 5.4   | 6.1   | 7.0   | 7.6   | 8.4   | 3.79     | 0.81     |  |
| Zinc, mg/d                   | 6.7            | 7.1   | 7.8   | 9.0   | 9.9   | 10.5  | 11.5  | 2.47     | 0.23     | 5.7   | 6.2              | 6.8   | 7.7   | 8.5   | 9.2   | 9.8   | 4.05     | 0.74     |  |
| Copper, mg/d                 | 0.80           | 0.80  | 0.90  | 1.00  | 1.10  | 1.20  | 1.20  | 2.74     | 0.26     | 0.70  | 0.80             | 0.90  | 0.90  | 1.10  | 1.10  | 1.30  | 3.64     | 0.54     |  |
| Nutrients with DG            |                |       |       |       |       |       |       |          |          |       |                  |       |       |       |       |       |          |          |  |
| Protein, % energy            | 12.4           | 12.7  | 13.7  | 14.4  | 15.2  | 15.9  | 16.6  | 3.14     | 0.16     | 12.2  | 12.9             | 13.5  | 14.4  | 14.9  | 15.8  | 16.7  | 2.97     | 0.00     |  |
| Fat, % energy                | 27.4           | 29.0  | 30.2  | 31.5  | 32.8  | 34.3  | 34.8  | 3.01     | -0.12    | 26.9  | 27.6             | 29.1  | 31.0  | 33.0  | 33.9  | 34.5  | 2.23     | -0.19    |  |
| SFA, % energy                | 8.8            | 9.2   | 9.8   | 10.3  | 10.6  | 11.1  | 11.2  | 3.10     | -0.55    | 8.0   | 8.2              | 8.9   | 10.0  | 10.9  | 11.3  | 11.5  | 3.13     | -0.53    |  |
| Carbohydrate, % energy       | 49.5           | 50.1  | 52.1  | 54.0  | 55.4  | 57.6  | 59.6  | 3.01     | 0.43     | 49.6  | 50.9             | 52.2  | 54.6  | 56.9  | 58.0  | 59.2  | 2.42     | -0.01    |  |
| Dietary fibre, g/d           | 13.6           | 15.1  | 16.2  | 18.0  | 19.9  | 21.2  | 22.4  | 2.55     | 0.05     | 12.4  | 12.9             | 15.2  | 16.7  | 19.0  | 20.7  | 22.8  | 2.77     | 0.20     |  |
| Sodium, g salt equivalent    | 7.0            | 7.4   | 8.2   | 9.2   | 10.0  | 11.3  | 11.8  | 2.94     | 0.28     | 6.7   | 7.2              | 8.1   | 8.6   | 9.4   | 10.3  | 11.1  | 5.75     | 1.04     |  |
| Potassium, mg/d              | 1884           | 1915  | 2062  | 2338  | 2554  | 2830  | 2881  | 2.59     | 0.43     | 1487  | 1719             | 1871  | 2174  | 2410  | 2515  | 2857  | 3.42     | 0.44     |  |
| Nutrients with AI            |                |       |       |       |       |       |       |          |          |       |                  |       |       |       |       |       |          |          |  |
| n-6 PUFA, g/d                | 6.80           | 7.00  | 7.90  | 9.90  | 11.80 | 13.10 | 13.90 | 3.08     | 0.64     | 7.00  | 7.30             | 7.90  | 8.80  | 10.20 | 11.00 | 12.10 | 2.96     | 0.62     |  |
| n-3 PUFA, g/d                | 1.00           | 1.00  | 1.40  | 1.70  | 2.00  | 2.30  | 2.50  | 3.02     | 0.58     | 1.10  | 1.20             | 1.40  | 1.50  | 1.80  | 2.00  | 2.10  | 2.25     | 0.18     |  |
| Vitamin D, µg/d              | 2.9            | 3.2   | 4.1   | 5.1   | 6.8   | 7.7   | 8.5   | 3.40     | 0.58     | 2.4   | 2.9              | 3.5   | 4.9   | 6.2   | 7.4   | 8.2   | 3.10     | 0.62     |  |
| Vitamin E, mg/d              | 5.6            | 5.7   | 6.1   | 6.8   | 7.6   | 8.2   | 9.2   | 3.47     | 0.64     | 5.1   | 5.2              | 5.8   | 6.5   | 7.2   | 8.0   | 8.5   | 2.95     | 0.30     |  |
| Vitamin K, µg/d              | 134            | 145   | 161   | 176   | 204   | 224   | 230   | 2.58     | 0.44     | 102   | 107              | 126   | 166   | 195   | 239   | 279   | 6.62     | 1.41     |  |
| Pantothenic acid, mg/d       | 4.80           | 5.00  | 5.40  | 5.90  | 6.60  | 7.60  | 7.90  | 2.82     | 0.52     | 4.30  | 4.40             | 4.90  | 5.50  | 6.00  | 6.60  | 6.90  | 3.52     | 0.60     |  |
| Potassium, mg/d              | 1884           | 1915  | 2062  | 2338  | 2554  | 2830  | 2881  | 2.59     | 0.43     | 1487  | 1719             | 1871  | 2174  | 2410  | 2515  | 2857  | 3.42     | 0.44     |  |
| Phosphorus, mg/d             | 826            | 854   | 977   | 1070  | 1197  | 1347  | 1361  | 2.74     | 0.28     | 755   | 805              | 867   | 961   | 1037  | 1123  | 1285  | 5.08     | 1.16     |  |
| Manganese, mg/d              | 2.00           | 2.10  | 2.40  | 2.70  | 3.00  | 3.30  | 3.60  | 2.98     | 0.48     | 1.70  | 1.90             | 2.20  | 2.40  | 3.00  | 3.60  | 4.00  | 4.53     | 1.08     |  |

AI, Adequate Intake; DG, Tentative Dietary Goal for Preventing Lifestyle-related Diseases; DRIs, Dietary Reference Intakes; EAR, Estimated Average Requirement; NE, niacin equivalent; SFA, saturated fatty acid; PUFA, polyunsaturated fatty acid; RAE, retinol active equivalent. <sup>a</sup> Usual intake was estimated using the Multiple Source Method based on 8-day weighed dietary-record data.



**Table S9.** Usual intake distribution of energy and nutrients among Japanese aged 10–11 years <sup>a</sup>.

| Variables                           | Males (N = 77) |       |       |       |       |       |       |          |          | Females (N = 67) |       |       |       |       |       |       |          |          |
|-------------------------------------|----------------|-------|-------|-------|-------|-------|-------|----------|----------|------------------|-------|-------|-------|-------|-------|-------|----------|----------|
|                                     | 5th            | 10th  | 25th  | 50th  | 75th  | 90th  | 95th  | kurtosis | skewness | 5th              | 10th  | 25th  | 50th  | 75th  | 90th  | 95th  | kurtosis | skewness |
| <b>Energy, kcal/d</b>               | 1710           | 1787  | 1944  | 2071  | 2284  | 2526  | 2622  | 5.66     | 1.04     | 1579             | 1626  | 1768  | 1914  | 2074  | 2249  | 2310  | 4.72     | 0.75     |
| <b>Nutrients without DRI values</b> |                |       |       |       |       |       |       |          |          |                  |       |       |       |       |       |       |          |          |
| Fat, g/d                            | 56.1           | 60.2  | 66.5  | 73.3  | 84.6  | 95.7  | 102.7 | 3.51     | 0.51     | 50.1             | 53.7  | 62.3  | 67.8  | 75.8  | 82.8  | 85.6  | 5.41     | 0.72     |
| SFA, g/d                            | 16.6           | 17.6  | 20.7  | 23.3  | 26.8  | 29.8  | 32.0  | 4.88     | 0.80     | 15.0             | 16.5  | 18.8  | 21.5  | 25.0  | 29.1  | 29.6  | 2.34     | 0.16     |
| Carbohydrate, g/d                   | 233.0          | 240.2 | 256.9 | 277.9 | 295.8 | 318.7 | 355.7 | 6.26     | 1.34     | 213.2            | 219.6 | 234.5 | 255.8 | 276.2 | 296.9 | 305.4 | 2.58     | 0.27     |
| <b>Nutrients with EAR</b>           |                |       |       |       |       |       |       |          |          |                  |       |       |       |       |       |       |          |          |
| Protein, g/d                        | 57.1           | 60.4  | 69.5  | 76.4  | 87.3  | 97.2  | 104.6 | 4.37     | 0.82     | 58.8             | 60.3  | 63.2  | 68.4  | 73.5  | 79.7  | 85.3  | 4.94     | 0.92     |
| Vitamin A, µg RAE/d                 | 369            | 383   | 450   | 576   | 658   | 796   | 840   | 8.12     | 1.67     | 353              | 406   | 457   | 536   | 634   | 701   | 719   | 2.33     | 0.03     |
| Thiamine, mg/d                      | 0.90           | 0.90  | 1.00  | 1.10  | 1.20  | 1.40  | 1.40  | 3.89     | 0.69     | 0.80             | 0.90  | 0.90  | 1.00  | 1.10  | 1.20  | 1.20  | 3.14     | -0.11    |
| Riboflavin, mg/d                    | 0.90           | 1.00  | 1.10  | 1.30  | 1.50  | 1.90  | 2.20  | 4.28     | 1.12     | 1.00             | 1.00  | 1.10  | 1.20  | 1.40  | 1.60  | 1.70  | 2.98     | 0.42     |
| Niacin, mg NE/d                     | 23.6           | 24.9  | 28.6  | 31.2  | 36.1  | 41.1  | 43.4  | 4.64     | 0.98     | 23.5             | 24.1  | 25.9  | 28.4  | 30.9  | 33.2  | 37.0  | 4.16     | 0.91     |
| Vitamin B-6, mg/d                   | 1.00           | 1.00  | 1.10  | 1.30  | 1.50  | 1.70  | 1.80  | 9.80     | 1.78     | 0.90             | 0.90  | 1.10  | 1.20  | 1.30  | 1.50  | 1.60  | 3.03     | 0.47     |
| Vitamin B-12, µg/d                  | 3.1            | 3.5   | 4.6   | 5.4   | 7.4   | 8.9   | 9.5   | 4.94     | 1.22     | 3.4              | 3.5   | 4.0   | 4.7   | 5.5   | 6.6   | 7.1   | 3.07     | 0.79     |
| Folate, µg/d                        | 183            | 199   | 228   | 287   | 318   | 358   | 422   | 9.04     | 1.77     | 199              | 222   | 241   | 274   | 295   | 320   | 333   | 3.76     | 0.33     |
| Vitamin C, mg/d                     | 51             | 59    | 70    | 90    | 107   | 127   | 134   | 12.99    | 2.23     | 57               | 62    | 75    | 90    | 105   | 114   | 119   | 3.14     | 0.41     |
| Sodium, mg/d                        | 2937           | 3151  | 3549  | 3923  | 4269  | 4840  | 5065  | 4.99     | 0.82     | 2853             | 2940  | 3189  | 3583  | 3864  | 4194  | 4439  | 3.27     | 0.49     |
| Calcium, mg/d                       | 396            | 419   | 511   | 613   | 755   | 967   | 1065  | 5.80     | 1.39     | 396              | 429   | 511   | 585   | 690   | 843   | 969   | 3.38     | 0.76     |
| Magnesium, mg/d                     | 184            | 195   | 214   | 243   | 274   | 308   | 355   | 9.02     | 1.78     | 178              | 186   | 206   | 228   | 247   | 263   | 288   | 5.55     | 1.07     |
| Iron, mg/d                          | 5.3            | 5.6   | 6.3   | 6.9   | 7.8   | 8.9   | 10.1  | 6.02     | 1.35     | 5.2              | 5.3   | 6.0   | 6.6   | 7.2   | 8.1   | 8.6   | 3.78     | 0.63     |
| Zinc, mg/d                          | 6.8            | 7.6   | 8.4   | 9.4   | 10.8  | 12.0  | 12.9  | 4.23     | 0.75     | 7.0              | 7.1   | 7.8   | 8.3   | 8.8   | 9.6   | 9.8   | 3.41     | 0.53     |
| Copper, mg/d                        | 0.90           | 0.90  | 1.00  | 1.10  | 1.20  | 1.40  | 1.40  | 5.37     | 1.22     | 0.80             | 0.90  | 0.90  | 1.00  | 1.10  | 1.10  | 1.20  | 4.67     | 0.77     |
| <b>Nutrients with DG</b>            |                |       |       |       |       |       |       |          |          |                  |       |       |       |       |       |       |          |          |
| Protein, % energy                   | 13.1           | 13.5  | 14.0  | 14.8  | 15.5  | 16.3  | 16.8  | 3.18     | 0.03     | 12.7             | 13.1  | 13.7  | 14.5  | 15.2  | 16.3  | 16.4  | 2.78     | 0.19     |
| Fat, % energy                       | 28.3           | 28.9  | 30.2  | 31.4  | 33.0  | 34.0  | 35.0  | 2.97     | -0.03    | 27.5             | 28.8  | 30.3  | 31.8  | 32.9  | 33.7  | 34.4  | 4.14     | -0.70    |
| SFA, % energy                       | 8.4            | 8.7   | 9.4   | 9.9   | 10.6  | 11.2  | 11.5  | 3.14     | 0.31     | 8.2              | 8.5   | 9.2   | 10.0  | 10.9  | 11.7  | 12.7  | 3.02     | 0.23     |
| Carbohydrate, % energy              | 49.2           | 50.1  | 51.4  | 53.3  | 55.2  | 57.1  | 58.6  | 2.83     | 0.01     | 50.1             | 51.0  | 51.8  | 53.8  | 54.7  | 57.9  | 59.3  | 4.49     | 1.00     |
| Dietary fibre, g/d                  | 14.1           | 16.0  | 17.5  | 18.9  | 20.6  | 22.6  | 24.6  | 6.53     | 1.18     | 15.1             | 15.7  | 16.9  | 17.9  | 19.6  | 20.7  | 22.9  | 4.26     | 0.67     |
| Sodium, g salt equivalent           | 7.5            | 8.0   | 9.0   | 10.0  | 10.8  | 12.3  | 12.9  | 4.99     | 0.82     | 7.2              | 7.5   | 8.1   | 9.1   | 9.8   | 10.7  | 11.3  | 3.27     | 0.49     |
| Potassium, mg/d                     | 1752           | 1886  | 2236  | 2436  | 2813  | 3245  | 3523  | 9.79     | 1.81     | 1771             | 1814  | 2119  | 2349  | 2546  | 2814  | 2952  | 3.65     | 0.54     |
| <b>Nutrients with AI</b>            |                |       |       |       |       |       |       |          |          |                  |       |       |       |       |       |       |          |          |
| n-6 PUFA, g/d                       | 7.70           | 8.70  | 9.80  | 10.60 | 12.20 | 13.90 | 15.90 | 3.84     | 0.66     | 7.50             | 7.80  | 8.50  | 9.70  | 11.20 | 11.70 | 12.80 | 10.44    | 1.96     |
| n-3 PUFA, g/d                       | 1.10           | 1.30  | 1.60  | 1.90  | 2.10  | 2.50  | 3.00  | 3.97     | 0.67     | 1.00             | 1.20  | 1.30  | 1.50  | 1.90  | 2.30  | 2.40  | 2.87     | 0.63     |
| Vitamin D, µg/d                     | 3.1            | 3.9   | 4.7   | 6.2   | 8.0   | 9.4   | 10.9  | 3.45     | 0.64     | 3.3              | 3.5   | 4.6   | 5.5   | 7.1   | 8.8   | 9.6   | 6.09     | 1.48     |
| Vitamin E, mg/d                     | 5.0            | 5.6   | 6.6   | 7.2   | 8.2   | 10.3  | 11.1  | 4.98     | 1.21     | 5.1              | 5.5   | 6.1   | 6.9   | 7.9   | 8.7   | 8.9   | 4.63     | 0.87     |
| Vitamin K, µg/d                     | 107            | 126   | 154   | 184   | 225   | 278   | 303   | 5.67     | 1.23     | 124              | 138   | 160   | 182   | 209   | 239   | 261   | 3.05     | 0.37     |
| Pantothenic acid, mg/d              | 4.60           | 5.00  | 5.70  | 6.40  | 7.30  | 8.60  | 9.70  | 4.66     | 0.96     | 4.80             | 5.20  | 5.50  | 5.90  | 6.60  | 7.00  | 7.30  | 3.98     | 0.52     |
| Potassium, mg/d                     | 1752           | 1886  | 2236  | 2436  | 2813  | 3245  | 3523  | 9.79     | 1.81     | 1771             | 1814  | 2119  | 2349  | 2546  | 2814  | 2952  | 3.65     | 0.54     |
| Phosphorus, mg/d                    | 817            | 866   | 1017  | 1149  | 1278  | 1567  | 1676  | 6.14     | 1.29     | 838              | 863   | 962   | 1040  | 1146  | 1241  | 1335  | 4.62     | 0.90     |
| Manganese, mg/d                     | 2.10           | 2.30  | 2.60  | 2.90  | 3.10  | 3.60  | 3.80  | 12.30    | 2.09     | 2.20             | 2.30  | 2.50  | 2.80  | 3.10  | 3.40  | 3.70  | 3.61     | 0.52     |

AI, Adequate Intake; DG, Tentative Dietary Goal for Preventing Lifestyle-related Diseases; DRIs, Dietary Reference Intakes; EAR, Estimated Average Requirement; NE, niacin equivalent; SFA, saturated fatty acid; PUFA, polyunsaturated fatty acid; RAE, retinol active equivalent. <sup>a</sup> Usual intake was estimated using the Multiple Source Method based on 8-day weighed dietary-record data.

**Table S10.** Usual intake distribution of energy and nutrients among Japanese aged 12–14 years <sup>a</sup>.

| Variables                           | Males (N = 107) |       |       |       |       |       |       |          |          | Females (N = 95) |       |       |       |       |       |       |          |          |
|-------------------------------------|-----------------|-------|-------|-------|-------|-------|-------|----------|----------|------------------|-------|-------|-------|-------|-------|-------|----------|----------|
|                                     | 5th             | 10th  | 25th  | 50th  | 75th  | 90th  | 95th  | kurtosis | skewness | 5th              | 10th  | 25th  | 50th  | 75th  | 90th  | 95th  | kurtosis | skewness |
| <b>Energy, kcal/d</b>               | 1888            | 2063  | 2397  | 2680  | 3009  | 3326  | 3565  | 4.94     | 0.71     | 1536             | 1734  | 1916  | 2072  | 2257  | 2476  | 2586  | 3.23     | 0.17     |
| <b>Nutrients without DRI values</b> |                 |       |       |       |       |       |       |          |          |                  |       |       |       |       |       |       |          |          |
| Fat, g/d                            | 65.5            | 69.5  | 79.8  | 92.4  | 103.7 | 117.0 | 125.4 | 6.00     | 1.07     | 55.9             | 58.2  | 66.5  | 74.5  | 82.5  | 94.7  | 100.6 | 3.38     | 0.60     |
| SFA, g/d                            | 19.3            | 20.8  | 25.4  | 29.9  | 33.4  | 36.4  | 39.7  | 4.76     | 0.63     | 17.3             | 18.2  | 20.7  | 24.0  | 27.3  | 30.3  | 33.7  | 4.00     | 0.75     |
| Carbohydrate, g/d                   | 249.3           | 274.5 | 323.3 | 364.2 | 431.5 | 474.2 | 510.8 | 3.36     | 0.50     | 201.0            | 217.2 | 244.7 | 278.1 | 305.1 | 318.1 | 352.0 | 2.88     | -0.06    |
| <b>Nutrients with EAR</b>           |                 |       |       |       |       |       |       |          |          |                  |       |       |       |       |       |       |          |          |
| Protein, g/d                        | 63.0            | 70.5  | 85.7  | 95.8  | 104.3 | 113.5 | 123.8 | 4.77     | 0.62     | 56.3             | 62.1  | 69.2  | 75.1  | 82.7  | 90.8  | 95.8  | 2.87     | -0.03    |
| Vitamin A, µg RAE/d                 | 434             | 460   | 541   | 613   | 749   | 865   | 941   | 4.24     | 0.73     | 354              | 373   | 449   | 544   | 618   | 722   | 810   | 2.87     | 0.38     |
| Thiamine, mg/d                      | 1.00            | 1.00  | 1.20  | 1.40  | 1.60  | 1.80  | 1.90  | 3.05     | 0.40     | 0.80             | 0.80  | 0.90  | 1.10  | 1.20  | 1.40  | 1.40  | 4.06     | 0.50     |
| Riboflavin, mg/d                    | 1.00            | 1.10  | 1.40  | 1.60  | 1.80  | 2.00  | 2.30  | 3.58     | 0.63     | 0.90             | 1.00  | 1.10  | 1.30  | 1.40  | 1.60  | 1.70  | 2.53     | 0.14     |
| Niacin, mg NE/d                     | 26.0            | 28.1  | 35.2  | 39.1  | 43.2  | 48.9  | 55.5  | 4.98     | 0.76     | 23.0             | 24.7  | 28.2  | 31.2  | 34.8  | 38.8  | 40.8  | 2.82     | 0.07     |
| Vitamin B-6, mg/d                   | 1.00            | 1.10  | 1.40  | 1.60  | 1.80  | 2.10  | 2.40  | 4.30     | 0.86     | 0.90             | 1.00  | 1.10  | 1.20  | 1.40  | 1.60  | 1.60  | 2.50     | 0.10     |
| Vitamin B-12, µg/d                  | 4.0             | 4.3   | 5.1   | 5.7   | 7.0   | 8.1   | 9.4   | 3.81     | 0.83     | 3.2              | 3.5   | 4.4   | 5.2   | 6.4   | 7.5   | 8.0   | 2.83     | 0.42     |
| Folate, µg/d                        | 211             | 223   | 262   | 319   | 388   | 437   | 524   | 4.38     | 1.12     | 195              | 205   | 244   | 289   | 326   | 379   | 424   | 3.28     | 0.57     |
| Vitamin C, mg/d                     | 63              | 66    | 78    | 99    | 134   | 162   | 179   | 4.62     | 1.18     | 42               | 54    | 74    | 91    | 112   | 134   | 157   | 3.83     | 0.75     |
| Sodium, mg/d                        | 3441            | 3621  | 3965  | 4570  | 4985  | 5793  | 6428  | 3.87     | 0.79     | 2816             | 3082  | 3344  | 3801  | 4270  | 4619  | 4862  | 2.74     | 0.08     |
| Calcium, mg/d                       | 417             | 480   | 568   | 689   | 876   | 993   | 1059  | 3.08     | 0.50     | 374              | 401   | 456   | 561   | 661   | 773   | 824   | 2.59     | 0.45     |
| Magnesium, mg/d                     | 192             | 215   | 247   | 293   | 330   | 372   | 426   | 7.02     | 1.29     | 170              | 190   | 211   | 236   | 263   | 296   | 303   | 2.35     | 0.12     |
| Iron, mg/d                          | 5.9             | 6.4   | 7.4   | 8.4   | 9.7   | 10.9  | 12.1  | 5.78     | 1.16     | 5.5              | 5.7   | 6.5   | 7.1   | 8.0   | 9.0   | 9.5   | 2.95     | 0.29     |
| Zinc, mg/d                          | 8.1             | 9.2   | 10.5  | 12.0  | 13.3  | 15.6  | 16.0  | 4.38     | 0.64     | 7.0              | 7.4   | 8.3   | 9.1   | 10.0  | 10.7  | 11.3  | 3.96     | 0.31     |
| Copper, mg/d                        | 0.90            | 1.00  | 1.20  | 1.30  | 1.60  | 1.80  | 1.90  | 7.33     | 1.40     | 0.80             | 0.90  | 1.00  | 1.10  | 1.20  | 1.30  | 1.40  | 2.71     | -0.02    |
| <b>Nutrients with DG</b>            |                 |       |       |       |       |       |       |          |          |                  |       |       |       |       |       |       |          |          |
| Protein, % energy                   | 12.3            | 12.6  | 13.4  | 14.0  | 14.9  | 15.7  | 15.9  | 2.84     | -0.04    | 12.4             | 13.4  | 14.0  | 14.7  | 15.3  | 16.0  | 16.6  | 3.44     | -0.31    |
| Fat, % energy                       | 26.5            | 27.1  | 28.5  | 30.6  | 32.1  | 34.0  | 35.0  | 2.97     | 0.46     | 27.4             | 28.4  | 29.9  | 32.3  | 34.1  | 36.2  | 37.2  | 2.47     | 0.00     |
| SFA, % energy                       | 8.1             | 8.3   | 8.9   | 9.6   | 10.3  | 10.7  | 11.2  | 3.05     | 0.14     | 8.4              | 9.0   | 9.5   | 10.2  | 11.0  | 11.9  | 12.3  | 2.93     | 0.22     |
| Carbohydrate, % energy              | 49.2            | 50.9  | 53.2  | 55.5  | 58.0  | 59.3  | 60.1  | 2.75     | -0.40    | 47.0             | 49.0  | 50.5  | 52.6  | 55.4  | 57.4  | 58.1  | 2.60     | 0.03     |
| Dietary fibre, g/d                  | 16.1            | 17.1  | 20.2  | 23.7  | 26.5  | 30.3  | 33.6  | 4.51     | 0.94     | 13.6             | 15.2  | 17.3  | 19.1  | 21.1  | 22.4  | 23.7  | 3.46     | -0.14    |
| Sodium, g salt equivalent           | 8.7             | 9.2   | 10.1  | 11.6  | 12.7  | 14.7  | 16.3  | 3.87     | 0.79     | 7.2              | 7.8   | 8.5   | 9.7   | 10.8  | 11.7  | 12.3  | 2.74     | 0.08     |
| Potassium, mg/d                     | 1952            | 2127  | 2440  | 2926  | 3380  | 3773  | 4479  | 4.36     | 0.92     | 1665             | 1934  | 2141  | 2449  | 2677  | 3013  | 3115  | 2.73     | -0.09    |
| <b>Nutrients with AI</b>            |                 |       |       |       |       |       |       |          |          |                  |       |       |       |       |       |       |          |          |
| n-6 PUFA, g/d                       | 9.20            | 9.90  | 11.90 | 13.10 | 15.20 | 17.10 | 18.40 | 5.68     | 1.05     | 7.80             | 8.60  | 9.70  | 10.60 | 12.10 | 13.20 | 14.10 | 3.37     | 0.30     |
| n-3 PUFA, g/d                       | 1.50            | 1.60  | 1.80  | 2.00  | 2.50  | 2.70  | 2.90  | 3.01     | 0.38     | 1.30             | 1.40  | 1.50  | 1.80  | 2.10  | 2.30  | 2.40  | 2.99     | 0.50     |
| Vitamin D, µg/d                     | 3.7             | 4.0   | 5.3   | 6.2   | 7.9   | 9.5   | 10.2  | 3.96     | 0.76     | 3.5              | 4.0   | 4.8   | 5.8   | 7.5   | 9.4   | 10.2  | 3.48     | 0.80     |
| Vitamin E, mg/d                     | 6.0             | 6.8   | 8.1   | 9.1   | 10.4  | 11.9  | 13.0  | 4.49     | 0.75     | 5.5              | 6.0   | 6.7   | 7.6   | 8.8   | 9.6   | 10.5  | 2.99     | 0.48     |
| Vitamin K, µg/d                     | 122             | 140   | 170   | 213   | 270   | 357   | 437   | 4.75     | 1.24     | 115              | 138   | 164   | 190   | 251   | 289   | 303   | 2.41     | 0.38     |
| Pantothenic acid, mg/d              | 5.00            | 5.70  | 6.80  | 7.80  | 8.80  | 10.10 | 10.90 | 4.54     | 0.75     | 4.30             | 5.00  | 5.70  | 6.10  | 6.80  | 7.50  | 7.90  | 3.31     | 0.15     |
| Potassium, mg/d                     | 1952            | 2127  | 2440  | 2926  | 3380  | 3773  | 4479  | 4.36     | 0.92     | 1665             | 1934  | 2141  | 2449  | 2677  | 3013  | 3115  | 2.73     | -0.09    |
| Phosphorus, mg/d                    | 918             | 998   | 1195  | 1393  | 1515  | 1750  | 1908  | 4.20     | 0.59     | 767              | 886   | 971   | 1092  | 1193  | 1316  | 1435  | 2.73     | 0.14     |
| Manganese, mg/d                     | 2.60            | 2.80  | 3.10  | 3.60  | 4.30  | 4.90  | 5.60  | 4.77     | 1.11     | 2.10             | 2.40  | 2.60  | 3.00  | 3.40  | 4.20  | 4.50  | 4.26     | 0.96     |

AI, Adequate Intake; DG, Tentative Dietary Goal for Preventing Lifestyle-related Diseases; DRIs, Dietary Reference Intakes; EAR, Estimated Average Requirement; NE, niacin equivalent; SFA, saturated fatty acid; PUFA, polyunsaturated fatty acid; RAE, retinol active equivalent. <sup>a</sup> Usual intake was estimated using the Multiple Source Method based on 8-day weighed dietary-record data.

**Table S11.** Usual intake distribution of energy and nutrients among Japanese aged 15–17 years <sup>a</sup>.

| Variables                           | Males (N = 122) |       |       |       |       |       |       |          |          | Females (N = 106) |       |       |       |       |       |       |          |          |
|-------------------------------------|-----------------|-------|-------|-------|-------|-------|-------|----------|----------|-------------------|-------|-------|-------|-------|-------|-------|----------|----------|
|                                     | 5th             | 10th  | 25th  | 50th  | 75th  | 90th  | 95th  | kurtosis | skewness | 5th               | 10th  | 25th  | 50th  | 75th  | 90th  | 95th  | kurtosis | skewness |
| <b>Energy, kcal/d</b>               | 1918            | 2054  | 2423  | 2947  | 3310  | 3818  | 4314  | 3.48     | 0.61     | 1423              | 1549  | 1701  | 1926  | 2206  | 2434  | 2501  | 2.48     | 0.07     |
| <b>Nutrients without DRI values</b> |                 |       |       |       |       |       |       |          |          |                   |       |       |       |       |       |       |          |          |
| Fat, g/d                            | 63.5            | 66.9  | 80.1  | 103.5 | 117.5 | 132.1 | 141.4 | 2.59     | 0.20     | 49.1              | 52.8  | 61.2  | 71.8  | 81.8  | 90.2  | 97.6  | 2.73     | 0.23     |
| SFA, g/d                            | 18.7            | 20.5  | 24.6  | 30.8  | 36.5  | 41.5  | 42.6  | 2.36     | 0.08     | 14.4              | 15.7  | 18.6  | 21.8  | 24.9  | 28.6  | 29.6  | 2.30     | 0.03     |
| Carbohydrate, g/d                   | 257.1           | 281.2 | 336.3 | 396.6 | 457.0 | 534.4 | 672.4 | 4.14     | 1.04     | 180.0             | 197.1 | 227.2 | 251.2 | 282.8 | 318.1 | 334.7 | 2.98     | 0.16     |
| <b>Nutrients with EAR</b>           |                 |       |       |       |       |       |       |          |          |                   |       |       |       |       |       |       |          |          |
| Protein, g/d                        | 62.7            | 68.3  | 87.0  | 104.6 | 119.9 | 140.7 | 149.2 | 4.31     | 0.70     | 51.8              | 54.3  | 61.6  | 70.4  | 79.5  | 89.8  | 93.0  | 2.92     | 0.28     |
| Vitamin A, µg RAE/d                 | 325             | 358   | 491   | 649   | 782   | 936   | 1097  | 2.98     | 0.51     | 285               | 319   | 373   | 489   | 558   | 725   | 779   | 3.50     | 0.70     |
| Thiamine, mg/d                      | 0.80            | 1.00  | 1.30  | 1.50  | 1.70  | 2.10  | 2.30  | 3.83     | 0.53     | 0.70              | 0.80  | 0.90  | 1.00  | 1.10  | 1.30  | 1.40  | 3.89     | 0.61     |
| Riboflavin, mg/d                    | 1.00            | 1.10  | 1.30  | 1.60  | 1.90  | 2.30  | 2.40  | 2.91     | 0.39     | 0.80              | 0.90  | 1.00  | 1.10  | 1.30  | 1.50  | 1.60  | 3.56     | 0.52     |
| Niacin, mg NE/d                     | 25.4            | 29.4  | 36.6  | 43.9  | 51.0  | 57.6  | 64.2  | 5.82     | 1.09     | 20.9              | 23.2  | 25.6  | 29.8  | 34.6  | 37.8  | 40.0  | 3.12     | 0.36     |
| Vitamin B-6, mg/d                   | 0.90            | 1.00  | 1.40  | 1.70  | 2.00  | 2.20  | 2.50  | 5.32     | 0.89     | 0.80              | 0.80  | 1.00  | 1.20  | 1.40  | 1.60  | 1.90  | 3.92     | 0.67     |
| Vitamin B-12, µg/d                  | 3.3             | 3.9   | 4.9   | 6.3   | 7.8   | 9.8   | 11.5  | 4.83     | 1.02     | 2.3               | 2.8   | 3.5   | 4.7   | 5.5   | 7.5   | 9.0   | 4.85     | 1.17     |
| Folate, µg/d                        | 191             | 232   | 289   | 361   | 427   | 496   | 544   | 6.56     | 1.01     | 177               | 195   | 226   | 276   | 327   | 430   | 459   | 5.60     | 1.25     |
| Vitamin C, mg/d                     | 49              | 59    | 86    | 113   | 139   | 158   | 174   | 7.87     | 1.03     | 46                | 52    | 68    | 84    | 110   | 139   | 175   | 6.20     | 1.44     |
| Sodium, mg/d                        | 3039            | 3513  | 4109  | 4746  | 5648  | 6817  | 7582  | 3.51     | 0.70     | 2658              | 2861  | 3258  | 3659  | 4278  | 4691  | 4844  | 2.95     | 0.27     |
| Calcium, mg/d                       | 310             | 358   | 475   | 604   | 789   | 922   | 1139  | 3.83     | 0.90     | 265               | 296   | 374   | 461   | 564   | 618   | 686   | 2.66     | 0.20     |
| Magnesium, mg/d                     | 170             | 203   | 253   | 304   | 345   | 404   | 446   | 4.06     | 0.57     | 152               | 161   | 184   | 216   | 246   | 295   | 315   | 3.26     | 0.56     |
| Iron, mg/d                          | 5.5             | 6.5   | 7.7   | 9.0   | 10.7  | 12.2  | 13.7  | 4.31     | 0.78     | 4.8               | 5.2   | 6.0   | 6.7   | 7.9   | 9.1   | 9.5   | 3.75     | 0.64     |
| Zinc, mg/d                          | 7.7             | 8.6   | 11.1  | 13.3  | 15.0  | 17.3  | 18.9  | 4.87     | 0.60     | 6.0               | 6.7   | 7.5   | 8.7   | 9.5   | 10.7  | 11.3  | 2.87     | 0.14     |
| Copper, mg/d                        | 0.90            | 1.00  | 1.20  | 1.50  | 1.70  | 2.00  | 2.30  | 4.66     | 0.96     | 0.70              | 0.80  | 0.90  | 1.00  | 1.10  | 1.30  | 1.40  | 3.20     | 0.42     |
| <b>Nutrients with DG</b>            |                 |       |       |       |       |       |       |          |          |                   |       |       |       |       |       |       |          |          |
| Protein, % energy                   | 12.3            | 12.6  | 13.1  | 14.1  | 15.0  | 15.8  | 16.2  | 5.80     | 0.93     | 12.4              | 12.7  | 13.5  | 14.4  | 15.5  | 16.8  | 17.4  | 2.72     | 0.27     |
| Fat, % energy                       | 24.3            | 25.1  | 28.3  | 30.2  | 32.6  | 34.9  | 36.0  | 2.93     | -0.12    | 27.6              | 28.2  | 30.6  | 32.7  | 34.6  | 36.1  | 37.1  | 3.89     | 0.24     |
| SFA, % energy                       | 6.9             | 7.6   | 8.3   | 9.1   | 10.2  | 11.1  | 11.4  | 2.81     | 0.04     | 7.9               | 8.3   | 9.1   | 9.8   | 10.6  | 11.3  | 11.7  | 2.86     | 0.14     |
| Carbohydrate, % energy              | 48.8            | 49.8  | 52.2  | 55.0  | 57.8  | 61.0  | 62.9  | 3.54     | -0.06    | 47.1              | 47.9  | 49.8  | 53.0  | 54.9  | 57.9  | 59.4  | 4.55     | -0.34    |
| Dietary fibre, g/d                  | 13.7            | 16.8  | 21.0  | 25.0  | 28.7  | 33.5  | 37.1  | 3.58     | 0.44     | 11.7              | 13.3  | 15.3  | 17.6  | 20.0  | 23.1  | 24.5  | 4.78     | 0.79     |
| Sodium, g salt equivalent           | 7.7             | 8.9   | 10.4  | 12.1  | 14.3  | 17.3  | 19.3  | 3.51     | 0.70     | 6.8               | 7.3   | 8.3   | 9.3   | 10.9  | 11.9  | 12.3  | 2.95     | 0.27     |
| Potassium, mg/d                     | 1578            | 1975  | 2530  | 3056  | 3563  | 4007  | 4084  | 4.47     | 0.45     | 1447              | 1531  | 1838  | 2124  | 2532  | 2967  | 3324  | 3.51     | 0.70     |
| <b>Nutrients with AI</b>            |                 |       |       |       |       |       |       |          |          |                   |       |       |       |       |       |       |          |          |
| n-6 PUFA, g/d                       | 8.50            | 9.50  | 11.70 | 14.40 | 16.80 | 19.50 | 21.10 | 2.55     | 0.28     | 7.40              | 8.20  | 9.10  | 10.30 | 12.10 | 13.10 | 13.90 | 6.06     | 1.08     |
| n-3 PUFA, g/d                       | 1.30            | 1.40  | 1.70  | 2.20  | 3.00  | 3.40  | 3.80  | 2.79     | 0.53     | 1.10              | 1.20  | 1.50  | 1.70  | 2.10  | 2.70  | 2.80  | 4.62     | 0.95     |
| Vitamin D, µg/d                     | 4.4             | 4.9   | 5.6   | 7.5   | 9.9   | 12.5  | 13.6  | 2.69     | 0.48     | 2.9               | 3.3   | 4.6   | 5.8   | 7.5   | 10.5  | 11.3  | 2.89     | 0.74     |
| Vitamin E, mg/d                     | 5.7             | 6.4   | 8.2   | 9.9   | 11.8  | 13.6  | 14.7  | 2.73     | 0.23     | 5.4               | 5.8   | 6.5   | 7.4   | 8.5   | 10.1  | 10.7  | 3.04     | 0.39     |
| Vitamin K, µg/d                     | 122             | 151   | 191   | 246   | 319   | 411   | 447   | 3.93     | 0.86     | 107               | 123   | 153   | 198   | 246   | 308   | 352   | 4.94     | 1.18     |
| Pantothenic acid, mg/d              | 4.70            | 5.20  | 7.20  | 8.30  | 9.50  | 10.90 | 11.90 | 3.52     | 0.39     | 4.00              | 4.30  | 4.90  | 5.60  | 6.30  | 7.00  | 7.60  | 2.97     | 0.31     |
| Potassium, mg/d                     | 1578            | 1975  | 2530  | 3056  | 3563  | 4007  | 4084  | 4.47     | 0.45     | 1447              | 1531  | 1838  | 2124  | 2532  | 2967  | 3324  | 3.51     | 0.70     |
| Phosphorus, mg/d                    | 850             | 947   | 1209  | 1445  | 1657  | 1930  | 2018  | 3.06     | 0.38     | 699               | 749   | 859   | 995   | 1109  | 1263  | 1378  | 2.95     | 0.32     |
| Manganese, mg/d                     | 2.80            | 3.20  | 3.60  | 4.30  | 5.20  | 6.30  | 7.30  | 5.36     | 1.33     | 2.10              | 2.30  | 2.60  | 3.00  | 3.40  | 4.10  | 4.40  | 21.14    | 3.08     |

AI, Adequate Intake; DG, Tentative Dietary Goal for Preventing Lifestyle-related Diseases; DRIs, Dietary Reference Intakes; EAR, Estimated Average Requirement; NE, niacin equivalent; SFA, saturated fatty acid; PUFA, polyunsaturated fatty acid; RAE, retinol active equivalent. <sup>a</sup> Usual intake was estimated using the Multiple Source Method based on 8-day weighed dietary-record data.

**Table S12.** Usual intake distribution of energy and nutrients among Japanese aged 18–29 years <sup>a</sup>.

| Variables                           | Males (N = 271) |       |       |       |       |       |       |          |          | Females (N = 291) |       |       |       |       |       |       |          |          |
|-------------------------------------|-----------------|-------|-------|-------|-------|-------|-------|----------|----------|-------------------|-------|-------|-------|-------|-------|-------|----------|----------|
|                                     | 5th             | 10th  | 25th  | 50th  | 75th  | 90th  | 95th  | kurtosis | skewness | 5th               | 10th  | 25th  | 50th  | 75th  | 90th  | 95th  | kurtosis | skewness |
| <b>Energy, kcal/d</b>               | 1475            | 1601  | 1819  | 2169  | 2519  | 2855  | 3097  | 3.82     | 0.42     | 1175              | 1278  | 1484  | 1687  | 1867  | 2000  | 2108  | 3.24     | 0.06     |
| <b>Nutrients without DRI values</b> |                 |       |       |       |       |       |       |          |          |                   |       |       |       |       |       |       |          |          |
| Fat, g/d                            | 42.0            | 49.6  | 62.1  | 74.1  | 87.0  | 103.1 | 112.2 | 3.63     | 0.41     | 39.2              | 42.4  | 49.6  | 57.4  | 67.4  | 75.7  | 84.0  | 3.65     | 0.38     |
| SFA, g/d                            | 12.1            | 14.0  | 17.2  | 21.1  | 26.1  | 30.6  | 34.9  | 3.71     | 0.61     | 10.6              | 12.1  | 14.3  | 17.3  | 20.1  | 23.6  | 25.7  | 3.43     | 0.40     |
| Carbohydrate, g/d                   | 191.6           | 212.8 | 246.6 | 292.6 | 337.0 | 392.7 | 424.2 | 4.21     | 0.51     | 152.5             | 169.3 | 195.8 | 221.7 | 244.9 | 270.4 | 291.7 | 3.62     | -0.09    |
| <b>Nutrients with EAR</b>           |                 |       |       |       |       |       |       |          |          |                   |       |       |       |       |       |       |          |          |
| Protein, g/d                        | 48.2            | 52.9  | 63.8  | 77.0  | 91.6  | 105.6 | 114.3 | 3.80     | 0.52     | 42.5              | 47.6  | 53.4  | 60.6  | 69.0  | 76.3  | 82.2  | 3.00     | 0.17     |
| Vitamin A, µg RAE/d                 | 220             | 244   | 317   | 422   | 545   | 661   | 791   | 3.65     | 0.75     | 227               | 261   | 320   | 424   | 521   | 610   | 690   | 6.47     | 1.26     |
| Thiamine, mg/d                      | 0.70            | 0.80  | 0.90  | 1.10  | 1.30  | 1.60  | 1.70  | 3.67     | 0.58     | 0.60              | 0.70  | 0.80  | 0.90  | 1.00  | 1.10  | 1.20  | 3.85     | 0.48     |
| Riboflavin, mg/d                    | 0.80            | 0.80  | 1.00  | 1.20  | 1.50  | 1.70  | 1.90  | 3.37     | 0.61     | 0.70              | 0.80  | 0.90  | 1.00  | 1.20  | 1.40  | 1.50  | 3.01     | 0.35     |
| Niacin, mg NE/d                     | 20.2            | 22.8  | 27.4  | 34.0  | 40.5  | 46.7  | 51.8  | 4.03     | 0.57     | 17.6              | 20.2  | 22.6  | 26.1  | 30.1  | 34.3  | 36.3  | 3.75     | 0.50     |
| Vitamin B-6, mg/d                   | 0.70            | 0.80  | 1.00  | 1.30  | 1.60  | 1.90  | 2.00  | 3.41     | 0.49     | 0.60              | 0.70  | 0.90  | 1.00  | 1.20  | 1.40  | 1.50  | 3.27     | 0.52     |
| Vitamin B-12, µg/d                  | 2.2             | 2.5   | 3.4   | 4.5   | 6.1   | 8.0   | 9.5   | 4.34     | 1.04     | 2.0               | 2.5   | 3.0   | 3.9   | 4.9   | 6.2   | 7.1   | 6.03     | 1.30     |
| Folate, µg/d                        | 138             | 177   | 224   | 282   | 344   | 428   | 491   | 5.61     | 1.04     | 154               | 174   | 205   | 255   | 315   | 369   | 427   | 4.62     | 0.97     |
| Vitamin C, mg/d                     | 32              | 44    | 60    | 80    | 106   | 136   | 164   | 4.16     | 0.97     | 37                | 46    | 58    | 79    | 99    | 119   | 141   | 5.10     | 1.08     |
| Sodium, mg/d                        | 2562            | 2979  | 3509  | 4062  | 4731  | 5316  | 6030  | 3.54     | 0.33     | 2272              | 2516  | 2921  | 3312  | 3821  | 4253  | 4501  | 3.10     | 0.16     |
| Calcium, mg/d                       | 230             | 259   | 324   | 414   | 541   | 683   | 783   | 3.93     | 0.98     | 240               | 257   | 320   | 381   | 472   | 573   | 633   | 6.76     | 1.22     |
| Magnesium, mg/d                     | 139             | 161   | 196   | 238   | 279   | 312   | 360   | 4.33     | 0.66     | 131               | 148   | 167   | 198   | 232   | 272   | 306   | 6.00     | 1.10     |
| Iron, mg/d                          | 4.6             | 5.0   | 6.1   | 7.4   | 8.6   | 10.0  | 11.0  | 3.93     | 0.54     | 4.3               | 4.6   | 5.3   | 6.2   | 7.3   | 8.5   | 9.2   | 4.36     | 0.78     |
| Zinc, mg/d                          | 5.8             | 6.6   | 7.7   | 9.3   | 11.2  | 12.8  | 14.4  | 3.93     | 0.56     | 4.9               | 5.6   | 6.2   | 7.2   | 8.2   | 9.0   | 9.7   | 3.10     | 0.21     |
| Copper, mg/d                        | 0.70            | 0.80  | 0.90  | 1.10  | 1.30  | 1.60  | 1.70  | 5.18     | 0.85     | 0.60              | 0.70  | 0.80  | 0.90  | 1.00  | 1.20  | 1.30  | 3.92     | 0.70     |
| <b>Nutrients with DG</b>            |                 |       |       |       |       |       |       |          |          |                   |       |       |       |       |       |       |          |          |
| Protein, % energy                   | 11.6            | 12.3  | 12.9  | 14.1  | 15.3  | 16.5  | 17.6  | 6.47     | 1.05     | 12.2              | 12.7  | 13.6  | 14.6  | 15.8  | 16.9  | 17.9  | 13.55    | 1.96     |
| Fat, % energy                       | 23.6            | 25.2  | 27.1  | 30.1  | 32.4  | 35.3  | 36.8  | 4.57     | 0.38     | 24.5              | 26.2  | 28.5  | 30.9  | 33.1  | 35.8  | 37.4  | 3.78     | 0.00     |
| SFA, % energy                       | 6.1             | 7.0   | 7.7   | 8.7   | 9.8   | 10.8  | 11.5  | 3.42     | 0.23     | 6.7               | 7.3   | 8.2   | 9.1   | 10.1  | 11.1  | 11.6  | 3.12     | 0.06     |
| Carbohydrate, % energy              | 45.3            | 47.9  | 51.8  | 54.7  | 57.8  | 61.3  | 63.1  | 4.51     | -0.44    | 45.3              | 46.6  | 50.6  | 53.8  | 56.8  | 59.3  | 60.6  | 4.82     | -0.35    |
| Dietary fibre, g/d                  | 12.2            | 13.5  | 15.8  | 19.1  | 22.5  | 26.2  | 28.0  | 4.35     | 0.55     | 10.9              | 12.1  | 13.8  | 16.2  | 18.2  | 20.4  | 22.2  | 3.18     | 0.36     |
| Sodium, g salt equivalent           | 6.5             | 7.6   | 8.9   | 10.3  | 12.0  | 13.5  | 15.3  | 3.54     | 0.33     | 5.8               | 6.4   | 7.4   | 8.4   | 9.7   | 10.8  | 11.4  | 3.10     | 0.16     |
| Potassium, mg/d                     | 1290            | 1505  | 1822  | 2260  | 2782  | 3256  | 3534  | 3.48     | 0.48     | 1269              | 1432  | 1638  | 1930  | 2292  | 2658  | 2951  | 4.15     | 0.77     |
| <b>Nutrients with AI</b>            |                 |       |       |       |       |       |       |          |          |                   |       |       |       |       |       |       |          |          |
| n-6 PUFA, g/d                       | 6.70            | 7.30  | 9.30  | 11.20 | 13.10 | 14.90 | 17.10 | 4.20     | 0.57     | 5.80              | 6.40  | 7.40  | 8.80  | 10.20 | 12.20 | 13.00 | 2.93     | 0.45     |
| n-3 PUFA, g/d                       | 0.90            | 1.10  | 1.40  | 1.90  | 2.40  | 2.70  | 3.10  | 3.80     | 0.51     | 0.70              | 0.80  | 1.10  | 1.50  | 1.90  | 2.30  | 2.60  | 4.15     | 0.84     |
| Vitamin D, µg/d                     | 2.0             | 2.6   | 3.6   | 4.9   | 6.9   | 9.0   | 10.3  | 6.25     | 1.28     | 2.4               | 2.8   | 3.7   | 5.0   | 6.5   | 8.8   | 9.8   | 8.72     | 1.68     |
| Vitamin E, mg/d                     | 4.3             | 5.0   | 6.3   | 7.8   | 9.3   | 10.8  | 12.0  | 3.28     | 0.38     | 4.0               | 4.7   | 5.6   | 6.5   | 7.6   | 8.9   | 9.4   | 3.57     | 0.43     |
| Vitamin K, µg/d                     | 88              | 105   | 148   | 202   | 257   | 335   | 407   | 5.98     | 1.24     | 91                | 107   | 141   | 180   | 237   | 287   | 319   | 5.36     | 1.09     |
| Pantothenic acid, mg/d              | 3.60            | 4.10  | 4.80  | 5.90  | 7.10  | 8.20  | 9.00  | 3.82     | 0.56     | 3.30              | 3.70  | 4.10  | 4.90  | 5.60  | 6.40  | 6.90  | 2.88     | 0.29     |
| Potassium, mg/d                     | 1290            | 1505  | 1822  | 2260  | 2782  | 3256  | 3534  | 3.48     | 0.48     | 1269              | 1432  | 1638  | 1930  | 2292  | 2658  | 2951  | 4.15     | 0.77     |
| Phosphorus, mg/d                    | 630             | 693   | 851   | 1037  | 1217  | 1413  | 1562  | 3.38     | 0.47     | 600               | 649   | 735   | 834   | 980   | 1089  | 1194  | 3.14     | 0.39     |
| Manganese, mg/d                     | 2.20            | 2.40  | 2.90  | 3.60  | 4.40  | 5.30  | 6.50  | 21.71    | 2.94     | 1.80              | 1.90  | 2.40  | 2.80  | 3.40  | 4.10  | 4.60  | 21.64    | 2.85     |

AI, Adequate Intake; DG, Tentative Dietary Goal for Preventing Lifestyle-related Diseases; DRIs, Dietary Reference Intakes; EAR, Estimated Average Requirement; NE, niacin equivalent; SFA, saturated fatty acid; PUFA, polyunsaturated fatty acid; RAE, retinol active equivalent. <sup>a</sup> Usual intake was estimated using the Multiple Source Method based on 8-day weighed dietary-record data.

**Table S13.** Usual intake distribution of energy and nutrients among Japanese aged 30–49 years <sup>a</sup>.

| Variables                           | Males (N = 439) |       |       |       |       |       |       |          |          | Females (N = 443) |       |       |       |       |       |       |          |          |
|-------------------------------------|-----------------|-------|-------|-------|-------|-------|-------|----------|----------|-------------------|-------|-------|-------|-------|-------|-------|----------|----------|
|                                     | 5th             | 10th  | 25th  | 50th  | 75th  | 90th  | 95th  | kurtosis | skewness | 5th               | 10th  | 25th  | 50th  | 75th  | 90th  | 95th  | kurtosis | skewness |
| <b>Energy, kcal/d</b>               | 1537            | 1621  | 1811  | 2098  | 2409  | 2730  | 2998  | 4.27     | 0.68     | 1266              | 1399  | 1577  | 1772  | 1976  | 2203  | 2304  | 6.75     | 0.73     |
| <b>Nutrients without DRI values</b> |                 |       |       |       |       |       |       |          |          |                   |       |       |       |       |       |       |          |          |
| Fat, g/d                            | 43.2            | 49.2  | 56.7  | 68.7  | 81.7  | 95.4  | 107.2 | 3.98     | 0.66     | 40.2              | 44.8  | 51.3  | 59.6  | 69.1  | 77.8  | 82.2  | 5.11     | 0.56     |
| SFA, g/d                            | 11.4            | 12.9  | 15.7  | 19.6  | 24.0  | 28.2  | 32.2  | 3.68     | 0.69     | 11.0              | 12.7  | 15.0  | 17.8  | 21.0  | 24.5  | 26.6  | 3.88     | 0.56     |
| Carbohydrate, g/d                   | 185.3           | 206.9 | 235.9 | 276.4 | 316.0 | 364.3 | 383.9 | 3.77     | 0.57     | 161.1             | 177.0 | 201.2 | 234.5 | 260.9 | 289.4 | 301.3 | 4.25     | 0.36     |
| <b>Nutrients with EAR</b>           |                 |       |       |       |       |       |       |          |          |                   |       |       |       |       |       |       |          |          |
| Protein, g/d                        | 48.6            | 54.1  | 64.4  | 75.1  | 87.0  | 98.5  | 103.1 | 5.57     | 0.71     | 46.2              | 50.1  | 56.9  | 64.5  | 72.7  | 79.0  | 83.8  | 4.06     | 0.33     |
| Vitamin A, µg RAE/d                 | 213             | 257   | 349   | 449   | 589   | 722   | 823   | 4.08     | 0.81     | 258               | 297   | 383   | 482   | 573   | 696   | 817   | 5.57     | 1.09     |
| Thiamine, mg/d                      | 0.70            | 0.80  | 0.90  | 1.10  | 1.30  | 1.40  | 1.50  | 3.67     | 0.46     | 0.60              | 0.70  | 0.80  | 0.90  | 1.10  | 1.20  | 1.30  | 3.60     | 0.24     |
| Riboflavin, mg/d                    | 0.80            | 0.90  | 1.00  | 1.20  | 1.50  | 1.70  | 1.80  | 3.82     | 0.60     | 0.70              | 0.80  | 1.00  | 1.10  | 1.30  | 1.50  | 1.60  | 3.91     | 0.51     |
| Niacin, mg NE/d                     | 21.6            | 24.1  | 28.5  | 33.8  | 39.7  | 45.7  | 49.6  | 4.09     | 0.61     | 20.4              | 22.4  | 24.8  | 28.4  | 32.7  | 36.5  | 39.6  | 3.93     | 0.56     |
| Vitamin B-6, mg/d                   | 0.80            | 0.80  | 1.00  | 1.30  | 1.50  | 1.80  | 2.00  | 4.66     | 0.82     | 0.70              | 0.80  | 1.00  | 1.10  | 1.30  | 1.50  | 1.60  | 4.68     | 0.70     |
| Vitamin B-12, µg/d                  | 2.5             | 3.0   | 4.0   | 5.0   | 6.5   | 8.4   | 9.5   | 5.76     | 1.24     | 2.1               | 2.6   | 3.3   | 4.4   | 5.6   | 7.2   | 9.2   | 5.02     | 1.24     |
| Folate, µg/d                        | 165             | 189   | 245   | 297   | 360   | 452   | 489   | 4.00     | 0.77     | 177               | 204   | 249   | 297   | 352   | 425   | 473   | 15.39    | 2.02     |
| Vitamin C, mg/d                     | 38              | 46    | 64    | 82    | 108   | 133   | 156   | 4.56     | 0.94     | 48                | 56    | 72    | 92    | 116   | 140   | 161   | 4.24     | 0.84     |
| Sodium, mg/d                        | 2684            | 3039  | 3581  | 4075  | 4612  | 5225  | 5652  | 3.45     | 0.09     | 2458              | 2648  | 3081  | 3473  | 3942  | 4399  | 4616  | 4.28     | 0.50     |
| Calcium, mg/d                       | 253             | 285   | 344   | 424   | 551   | 695   | 772   | 3.25     | 0.78     | 271               | 305   | 367   | 447   | 533   | 631   | 727   | 4.41     | 0.88     |
| Magnesium, mg/d                     | 156             | 175   | 211   | 254   | 292   | 346   | 380   | 4.12     | 0.68     | 159               | 177   | 200   | 232   | 263   | 300   | 332   | 7.42     | 1.26     |
| Iron, mg/d                          | 4.6             | 5.2   | 6.3   | 7.4   | 8.7   | 10.3  | 11.4  | 5.73     | 0.89     | 4.6               | 5.0   | 6.0   | 7.0   | 7.9   | 9.0   | 9.8   | 6.56     | 1.03     |
| Zinc, mg/d                          | 5.8             | 6.5   | 7.6   | 9.0   | 10.5  | 11.8  | 12.7  | 7.14     | 0.89     | 5.1               | 5.8   | 6.6   | 7.6   | 8.5   | 9.4   | 9.8   | 3.26     | 0.09     |
| Copper, mg/d                        | 0.70            | 0.80  | 0.90  | 1.10  | 1.30  | 1.50  | 1.70  | 3.78     | 0.57     | 0.70              | 0.70  | 0.90  | 1.00  | 1.10  | 1.30  | 1.40  | 7.76     | 1.13     |
| <b>Nutrients with DG</b>            |                 |       |       |       |       |       |       |          |          |                   |       |       |       |       |       |       |          |          |
| Protein, % energy                   | 11.3            | 12.0  | 13.1  | 14.2  | 15.2  | 16.4  | 17.4  | 7.89     | 0.89     | 12.3              | 12.9  | 13.7  | 14.6  | 15.6  | 16.6  | 17.2  | 6.85     | 0.68     |
| Fat, % energy                       | 21.1            | 23.0  | 26.0  | 29.2  | 32.4  | 34.7  | 36.0  | 3.21     | 0.03     | 24.2              | 25.7  | 27.9  | 30.4  | 32.5  | 34.3  | 35.5  | 3.64     | -0.20    |
| SFA, % energy                       | 5.7             | 6.1   | 7.1   | 8.3   | 9.4   | 10.4  | 11.0  | 3.49     | 0.32     | 6.5               | 7.0   | 7.9   | 9.0   | 9.9   | 10.8  | 11.5  | 3.54     | 0.16     |
| Carbohydrate, % energy              | 41.6            | 44.9  | 49.2  | 53.5  | 57.1  | 60.0  | 62.4  | 3.65     | -0.32    | 44.7              | 47.0  | 50.3  | 53.2  | 56.2  | 58.9  | 60.5  | 4.97     | -0.74    |
| Dietary fibre, g/d                  | 12.4            | 13.7  | 16.6  | 19.3  | 22.7  | 25.9  | 27.8  | 3.40     | 0.30     | 12.1              | 13.5  | 15.3  | 17.8  | 20.0  | 21.6  | 24.2  | 7.11     | 1.02     |
| Sodium, g salt equivalent           | 6.8             | 7.7   | 9.1   | 10.4  | 11.7  | 13.3  | 14.4  | 3.45     | 0.09     | 6.2               | 6.7   | 7.8   | 8.8   | 10.0  | 11.2  | 11.7  | 4.28     | 0.50     |
| Potassium, mg/d                     | 1479            | 1580  | 1917  | 2347  | 2804  | 3199  | 3624  | 3.70     | 0.57     | 1509              | 1663  | 1949  | 2260  | 2632  | 2914  | 3186  | 5.39     | 0.77     |
| <b>Nutrients with AI</b>            |                 |       |       |       |       |       |       |          |          |                   |       |       |       |       |       |       |          |          |
| n-6 PUFA, g/d                       | 6.40            | 7.40  | 8.90  | 10.80 | 12.90 | 15.30 | 16.80 | 3.67     | 0.56     | 6.40              | 7.10  | 8.20  | 9.50  | 11.00 | 12.30 | 13.60 | 4.96     | 0.77     |
| n-3 PUFA, g/d                       | 1.00            | 1.20  | 1.60  | 2.00  | 2.40  | 3.00  | 3.30  | 3.19     | 0.44     | 0.90              | 1.10  | 1.30  | 1.70  | 2.10  | 2.50  | 2.80  | 9.31     | 1.67     |
| Vitamin D, µg/d                     | 2.4             | 3.0   | 3.9   | 5.6   | 7.8   | 10.2  | 11.5  | 5.86     | 1.21     | 2.3               | 2.7   | 3.8   | 5.3   | 7.0   | 8.9   | 9.9   | 4.83     | 1.06     |
| Vitamin E, mg/d                     | 4.7             | 5.2   | 6.2   | 7.6   | 9.0   | 10.7  | 11.8  | 4.11     | 0.76     | 4.7               | 5.2   | 6.1   | 7.0   | 8.3   | 9.6   | 10.1  | 5.41     | 0.88     |
| Vitamin K, µg/d                     | 103             | 120   | 156   | 205   | 263   | 340   | 393   | 7.69     | 1.40     | 121               | 137   | 163   | 200   | 249   | 321   | 377   | 7.27     | 1.63     |
| Pantothenic acid, mg/d              | 3.80            | 4.00  | 4.90  | 5.80  | 6.80  | 7.60  | 8.50  | 3.58     | 0.47     | 3.60              | 4.00  | 4.60  | 5.20  | 6.00  | 6.60  | 7.10  | 4.39     | 0.58     |
| Potassium, mg/d                     | 1479            | 1580  | 1917  | 2347  | 2804  | 3199  | 3624  | 3.70     | 0.57     | 1509              | 1663  | 1949  | 2260  | 2632  | 2914  | 3186  | 5.39     | 0.77     |
| Phosphorus, mg/d                    | 657             | 737   | 869   | 1020  | 1205  | 1390  | 1475  | 3.60     | 0.49     | 649               | 709   | 808   | 922   | 1059  | 1157  | 1262  | 4.41     | 0.51     |
| Manganese, mg/d                     | 2.30            | 2.50  | 3.00  | 3.50  | 4.30  | 5.30  | 6.00  | 7.68     | 1.36     | 2.00              | 2.30  | 2.60  | 3.10  | 3.70  | 4.60  | 5.40  | 158.55   | 10.03    |

AI, Adequate Intake; DG, Tentative Dietary Goal for Preventing Lifestyle-related Diseases; DRIs, Dietary Reference Intakes; EAR, Estimated Average Requirement; NE, niacin equivalent; SFA, saturated fatty acid; PUFA, polyunsaturated fatty acid; RAE, retinol active equivalent. <sup>a</sup> Usual intake was estimated using the Multiple Source Method based on 8-day weighed dietary-record data.

**Table S14.** Usual intake distribution of energy and nutrients among Japanese aged 50–64 years <sup>a</sup>.

| Variables                           | Males (N = 336) |       |       |       |       |       |       |          |          | Females (N = 362) |       |       |       |       |       |       |          |          |
|-------------------------------------|-----------------|-------|-------|-------|-------|-------|-------|----------|----------|-------------------|-------|-------|-------|-------|-------|-------|----------|----------|
|                                     | 5th             | 10th  | 25th  | 50th  | 75th  | 90th  | 95th  | kurtosis | skewness | 5th               | 10th  | 25th  | 50th  | 75th  | 90th  | 95th  | kurtosis | skewness |
| <b>Energy, kcal/d</b>               | 1591            | 1779  | 1996  | 2266  | 2527  | 2775  | 2999  | 4.87     | 0.43     | 1408              | 1513  | 1675  | 1867  | 2049  | 2234  | 2395  | 3.20     | 0.20     |
| <b>Nutrients without DRI values</b> |                 |       |       |       |       |       |       |          |          |                   |       |       |       |       |       |       |          |          |
| Fat, g/d                            | 44.6            | 51.1  | 60.7  | 70.2  | 82.9  | 94.3  | 101.1 | 3.96     | 0.47     | 45.5              | 48.9  | 55.4  | 62.9  | 71.9  | 79.9  | 85.6  | 3.74     | 0.52     |
| SFA, g/d                            | 11.9            | 13.2  | 15.9  | 19.7  | 23.1  | 27.2  | 30.4  | 3.87     | 0.67     | 12.2              | 13.6  | 15.9  | 18.5  | 21.0  | 24.1  | 26.3  | 3.36     | 0.43     |
| Carbohydrate, g/d                   | 198.4           | 218.1 | 248.1 | 285.3 | 322.0 | 360.9 | 385.5 | 3.42     | 0.15     | 171.6             | 186.2 | 212.9 | 241.2 | 273.5 | 299.4 | 309.4 | 2.94     | 0.06     |
| <b>Nutrients with EAR</b>           |                 |       |       |       |       |       |       |          |          |                   |       |       |       |       |       |       |          |          |
| Protein, g/d                        | 57.0            | 61.6  | 72.7  | 83.5  | 94.1  | 105.9 | 111.8 | 5.29     | 0.57     | 53.6              | 56.8  | 61.8  | 70.6  | 78.4  | 86.2  | 92.1  | 3.21     | 0.37     |
| Vitamin A, µg RAE/d                 | 290             | 342   | 421   | 533   | 669   | 837   | 923   | 7.13     | 1.40     | 324               | 370   | 464   | 565   | 686   | 790   | 858   | 4.48     | 0.69     |
| Thiamine, mg/d                      | 0.80            | 0.80  | 1.00  | 1.10  | 1.40  | 1.50  | 1.70  | 3.44     | 0.48     | 0.70              | 0.80  | 0.90  | 1.00  | 1.10  | 1.30  | 1.40  | 3.47     | 0.46     |
| Riboflavin, mg/d                    | 0.90            | 1.00  | 1.20  | 1.40  | 1.60  | 1.80  | 2.00  | 3.77     | 0.67     | 0.90              | 1.00  | 1.10  | 1.30  | 1.50  | 1.70  | 1.80  | 3.35     | 0.40     |
| Niacin, mg NE/d                     | 25.6            | 28.5  | 32.5  | 38.1  | 44.2  | 50.6  | 53.9  | 5.20     | 0.76     | 23.8              | 24.8  | 28.2  | 31.8  | 35.9  | 40.4  | 43.7  | 3.37     | 0.54     |
| Vitamin B-6, mg/d                   | 0.90            | 1.00  | 1.20  | 1.50  | 1.80  | 2.10  | 2.30  | 3.61     | 0.56     | 0.90              | 0.90  | 1.10  | 1.30  | 1.50  | 1.80  | 1.90  | 3.15     | 0.45     |
| Vitamin B-12, µg/d                  | 3.7             | 4.2   | 5.6   | 7.2   | 8.8   | 11.5  | 13.2  | 5.76     | 1.24     | 3.6               | 3.9   | 4.5   | 5.6   | 7.3   | 8.6   | 9.7   | 6.08     | 1.12     |
| Folate, µg/d                        | 216             | 237   | 288   | 358   | 449   | 505   | 563   | 3.52     | 0.58     | 234               | 261   | 305   | 360   | 427   | 501   | 541   | 5.22     | 0.90     |
| Vitamin C, mg/d                     | 52              | 61    | 76    | 104   | 139   | 175   | 193   | 3.69     | 0.75     | 67                | 76    | 96    | 119   | 151   | 181   | 204   | 3.17     | 0.59     |
| Sodium, mg/d                        | 2868            | 3236  | 3817  | 4474  | 5060  | 5755  | 6302  | 3.71     | 0.40     | 2793              | 2970  | 3400  | 3808  | 4414  | 4782  | 5069  | 2.94     | 0.29     |
| Calcium, mg/d                       | 306             | 343   | 423   | 514   | 644   | 767   | 824   | 4.16     | 0.81     | 341               | 373   | 444   | 527   | 620   | 711   | 772   | 3.67     | 0.57     |
| Magnesium, mg/d                     | 194             | 217   | 253   | 300   | 353   | 402   | 427   | 3.52     | 0.43     | 189               | 203   | 236   | 269   | 312   | 352   | 380   | 3.36     | 0.53     |
| Iron, mg/d                          | 5.8             | 6.3   | 7.2   | 8.7   | 10.1  | 11.6  | 12.2  | 5.01     | 0.68     | 5.4               | 6.2   | 7.0   | 7.9   | 9.1   | 10.2  | 10.8  | 4.04     | 0.57     |
| Zinc, mg/d                          | 6.3             | 7.0   | 8.1   | 9.4   | 10.9  | 12.2  | 13.0  | 4.59     | 0.39     | 5.8               | 6.3   | 7.1   | 8.0   | 8.9   | 10.0  | 10.5  | 3.47     | 0.42     |
| Copper, mg/d                        | 0.80            | 0.90  | 1.10  | 1.30  | 1.50  | 1.70  | 1.80  | 3.87     | 0.41     | 0.80              | 0.90  | 1.00  | 1.10  | 1.30  | 1.40  | 1.50  | 3.65     | 0.45     |
| <b>Nutrients with DG</b>            |                 |       |       |       |       |       |       |          |          |                   |       |       |       |       |       |       |          |          |
| Protein, % energy                   | 12.2            | 12.7  | 13.7  | 14.8  | 15.9  | 16.9  | 17.3  | 3.42     | 0.05     | 13.0              | 13.6  | 14.3  | 15.2  | 16.3  | 17.2  | 17.9  | 5.20     | 0.75     |
| Fat, % energy                       | 21.1            | 22.7  | 25.1  | 28.1  | 30.9  | 33.3  | 34.9  | 2.94     | -0.04    | 25.3              | 26.4  | 28.1  | 30.2  | 32.6  | 34.7  | 36.5  | 3.27     | 0.26     |
| SFA, % energy                       | 5.2             | 5.8   | 6.7   | 7.7   | 8.8   | 9.8   | 10.5  | 3.78     | 0.41     | 6.8               | 7.3   | 7.9   | 8.7   | 9.6   | 10.5  | 11.0  | 4.47     | 0.55     |
| Carbohydrate, % energy              | 39.9            | 42.0  | 46.8  | 51.6  | 55.7  | 59.4  | 60.9  | 3.22     | -0.39    | 43.8              | 45.3  | 49.1  | 52.6  | 55.9  | 58.4  | 60.0  | 3.57     | -0.48    |
| Dietary fibre, g/d                  | 13.7            | 15.3  | 18.1  | 21.9  | 25.1  | 28.4  | 30.9  | 4.84     | 0.52     | 13.9              | 15.0  | 17.6  | 20.1  | 22.8  | 25.1  | 27.2  | 3.16     | 0.30     |
| Sodium, g salt equivalent           | 7.3             | 8.2   | 9.7   | 11.4  | 12.9  | 14.6  | 16.0  | 3.71     | 0.40     | 7.1               | 7.5   | 8.6   | 9.7   | 11.2  | 12.1  | 12.9  | 2.94     | 0.29     |
| Potassium, mg/d                     | 1750            | 1982  | 2286  | 2783  | 3317  | 3769  | 4123  | 2.92     | 0.32     | 1766              | 1950  | 2265  | 2652  | 3083  | 3529  | 3767  | 3.22     | 0.39     |
| <b>Nutrients with AI</b>            |                 |       |       |       |       |       |       |          |          |                   |       |       |       |       |       |       |          |          |
| n-6 PUFA, g/d                       | 7.40            | 8.20  | 9.60  | 11.60 | 13.50 | 15.50 | 17.00 | 4.73     | 0.61     | 7.30              | 7.70  | 8.90  | 10.30 | 11.50 | 13.30 | 14.20 | 3.31     | 0.51     |
| n-3 PUFA, g/d                       | 1.40            | 1.50  | 1.90  | 2.40  | 2.90  | 3.60  | 3.90  | 3.75     | 0.65     | 1.30              | 1.40  | 1.60  | 2.00  | 2.40  | 2.90  | 3.20  | 4.83     | 0.95     |
| Vitamin D, µg/d                     | 3.9             | 4.5   | 6.0   | 7.9   | 10.4  | 13.5  | 15.3  | 4.08     | 0.91     | 4.1               | 4.7   | 5.5   | 7.1   | 8.7   | 11.1  | 12.4  | 3.95     | 0.94     |
| Vitamin E, mg/d                     | 5.2             | 6.0   | 6.9   | 8.6   | 10.0  | 11.3  | 12.4  | 3.13     | 0.35     | 5.4               | 6.1   | 7.1   | 8.3   | 9.3   | 10.7  | 11.6  | 3.13     | 0.34     |
| Vitamin K, µg/d                     | 118             | 139   | 175   | 246   | 325   | 412   | 451   | 3.72     | 0.84     | 133               | 152   | 186   | 237   | 298   | 379   | 409   | 5.62     | 1.15     |
| Pantothenic acid, mg/d              | 4.40            | 4.70  | 5.40  | 6.40  | 7.60  | 8.30  | 9.00  | 3.15     | 0.32     | 4.20              | 4.40  | 5.00  | 5.80  | 6.60  | 7.40  | 7.90  | 2.97     | 0.29     |
| Potassium, mg/d                     | 1750            | 1982  | 2286  | 2783  | 3317  | 3769  | 4123  | 2.92     | 0.32     | 1766              | 1950  | 2265  | 2652  | 3083  | 3529  | 3767  | 3.22     | 0.39     |
| Phosphorus, mg/d                    | 803             | 862   | 999   | 1170  | 1352  | 1521  | 1620  | 4.33     | 0.55     | 764               | 808   | 901   | 1043  | 1157  | 1295  | 1353  | 3.16     | 0.34     |
| Manganese, mg/d                     | 2.50            | 2.80  | 3.40  | 4.00  | 4.90  | 6.00  | 6.50  | 4.21     | 0.91     | 2.30              | 2.60  | 3.10  | 3.70  | 4.50  | 5.10  | 5.50  | 25.36    | 3.53     |

AI, Adequate Intake; DG, Tentative Dietary Goal for Preventing Lifestyle-related Diseases; DRIs, Dietary Reference Intakes; EAR, Estimated Average Requirement; NE, niacin equivalent; SFA, saturated fatty acid; PUFA, polyunsaturated fatty acid; RAE, retinol active equivalent. <sup>a</sup> Usual intake was estimated using the Multiple Source Method based on 8-day weighed dietary-record data.

**Table S15.** Usual intake distribution of energy and nutrients among Japanese aged 65–74 years <sup>a</sup>.

| Variables                           | Males (N = 229) |       |       |       |       |       |       |          |          | Females (N = 243) |       |       |       |       |       |       |          |          |
|-------------------------------------|-----------------|-------|-------|-------|-------|-------|-------|----------|----------|-------------------|-------|-------|-------|-------|-------|-------|----------|----------|
|                                     | 5th             | 10th  | 25th  | 50th  | 75th  | 90th  | 95th  | kurtosis | skewness | 5th               | 10th  | 25th  | 50th  | 75th  | 90th  | 95th  | kurtosis | skewness |
| <b>Energy, kcal/d</b>               | 1644            | 1774  | 2004  | 2215  | 2440  | 2681  | 2805  | 4.17     | 0.33     | 1510              | 1583  | 1709  | 1868  | 2049  | 2254  | 2373  | 12.11    | 1.71     |
| <b>Nutrients without DRI values</b> |                 |       |       |       |       |       |       |          |          |                   |       |       |       |       |       |       |          |          |
| Fat, g/d                            | 43.9            | 48.8  | 59.2  | 68.7  | 78.1  | 87.3  | 95.2  | 4.36     | 0.65     | 43.7              | 47.5  | 53.7  | 63.3  | 71.1  | 80.7  | 87.6  | 3.93     | 0.62     |
| SFA, g/d                            | 11.2            | 12.9  | 15.6  | 18.5  | 22.3  | 25.0  | 27.3  | 3.71     | 0.64     | 11.2              | 12.4  | 14.2  | 17.4  | 20.5  | 23.5  | 25.6  | 3.39     | 0.50     |
| Carbohydrate, g/d                   | 195.0           | 218.8 | 250.3 | 282.8 | 318.8 | 348.1 | 372.8 | 3.47     | 0.24     | 188.7             | 202.0 | 221.4 | 246.6 | 273.9 | 302.3 | 322.8 | 13.42    | 1.74     |
| <b>Nutrients with EAR</b>           |                 |       |       |       |       |       |       |          |          |                   |       |       |       |       |       |       |          |          |
| Protein, g/d                        | 61.7            | 66.3  | 75.5  | 85.0  | 94.0  | 102.6 | 107.3 | 4.50     | 0.38     | 56.0              | 60.5  | 67.0  | 74.4  | 84.7  | 94.6  | 98.1  | 4.36     | 0.78     |
| Vitamin A, µg RAE/d                 | 353             | 391   | 509   | 628   | 770   | 953   | 1055  | 6.91     | 1.34     | 373               | 427   | 518   | 636   | 795   | 1028  | 1223  | 11.74    | 1.98     |
| Thiamine, mg/d                      | 0.70            | 0.80  | 1.00  | 1.10  | 1.30  | 1.50  | 1.70  | 3.71     | 0.61     | 0.70              | 0.80  | 0.90  | 1.10  | 1.20  | 1.40  | 1.50  | 4.14     | 0.70     |
| Riboflavin, mg/d                    | 1.00            | 1.10  | 1.30  | 1.50  | 1.70  | 1.90  | 2.10  | 4.56     | 0.68     | 1.00              | 1.00  | 1.20  | 1.40  | 1.70  | 1.90  | 2.10  | 3.08     | 0.55     |
| Niacin, mg NE/d                     | 27.6            | 29.2  | 33.0  | 38.0  | 43.4  | 48.3  | 51.3  | 4.98     | 0.68     | 24.2              | 26.5  | 29.7  | 33.8  | 38.5  | 43.1  | 46.2  | 4.29     | 0.83     |
| Vitamin B-6, mg/d                   | 1.10            | 1.20  | 1.40  | 1.60  | 1.80  | 2.20  | 2.30  | 4.24     | 0.67     | 1.00              | 1.10  | 1.30  | 1.50  | 1.70  | 2.00  | 2.10  | 3.67     | 0.69     |
| Vitamin B-12, µg/d                  | 4.6             | 5.3   | 6.4   | 8.0   | 10.3  | 12.9  | 14.5  | 5.80     | 1.29     | 3.6               | 4.0   | 5.5   | 7.1   | 9.2   | 12.2  | 13.8  | 4.64     | 1.17     |
| Folate, µg/d                        | 267             | 292   | 366   | 427   | 498   | 599   | 674   | 4.77     | 0.94     | 245               | 272   | 348   | 415   | 504   | 604   | 693   | 3.43     | 0.78     |
| Vitamin C, mg/d                     | 74              | 84    | 111   | 137   | 161   | 199   | 224   | 3.28     | 0.53     | 76                | 85    | 116   | 146   | 185   | 217   | 240   | 3.89     | 0.69     |
| Sodium, mg/d                        | 3094            | 3396  | 3905  | 4636  | 5291  | 5944  | 6406  | 3.18     | 0.13     | 3074              | 3146  | 3537  | 3977  | 4666  | 5427  | 5891  | 3.95     | 0.86     |
| Calcium, mg/d                       | 361             | 397   | 472   | 598   | 714   | 828   | 914   | 3.06     | 0.51     | 359               | 396   | 483   | 605   | 742   | 905   | 946   | 2.74     | 0.43     |
| Magnesium, mg/d                     | 220             | 239   | 279   | 318   | 363   | 417   | 449   | 5.46     | 0.91     | 206               | 224   | 260   | 296   | 349   | 413   | 458   | 4.20     | 0.91     |
| Iron, mg/d                          | 6.7             | 7.2   | 8.2   | 9.4   | 10.6  | 12.4  | 13.5  | 4.96     | 0.83     | 5.9               | 6.8   | 7.7   | 8.9   | 10.6  | 12.0  | 13.4  | 4.35     | 0.84     |
| Zinc, mg/d                          | 7.0             | 7.4   | 8.3   | 9.3   | 10.6  | 11.7  | 12.7  | 3.59     | 0.35     | 6.4               | 6.8   | 7.6   | 8.4   | 9.7   | 10.8  | 11.4  | 7.41     | 1.47     |
| Copper, mg/d                        | 0.90            | 1.00  | 1.20  | 1.30  | 1.50  | 1.70  | 1.80  | 3.96     | 0.51     | 0.90              | 0.90  | 1.10  | 1.20  | 1.40  | 1.60  | 1.80  | 4.16     | 0.90     |
| <b>Nutrients with DG</b>            |                 |       |       |       |       |       |       |          |          |                   |       |       |       |       |       |       |          |          |
| Protein, % energy                   | 13.2            | 13.7  | 14.3  | 15.3  | 16.1  | 17.2  | 17.9  | 3.52     | 0.56     | 13.8              | 14.1  | 15.1  | 16.1  | 17.2  | 18.1  | 19.0  | 3.21     | 0.34     |
| Fat, % energy                       | 20.8            | 22.2  | 24.7  | 27.7  | 29.7  | 33.1  | 34.7  | 3.02     | 0.25     | 23.8              | 24.6  | 26.8  | 29.4  | 32.2  | 35.0  | 36.1  | 2.93     | 0.24     |
| SFA, % energy                       | 5.2             | 5.8   | 6.6   | 7.4   | 8.5   | 9.6   | 10.2  | 2.71     | 0.23     | 5.9               | 6.5   | 7.3   | 8.2   | 9.3   | 10.3  | 10.9  | 2.86     | 0.19     |
| Carbohydrate, % energy              | 41.5            | 43.1  | 46.9  | 52.5  | 56.5  | 59.7  | 61.7  | 2.62     | -0.17    | 44.2              | 46.6  | 50.0  | 53.5  | 56.2  | 59.4  | 60.4  | 3.04     | -0.43    |
| Dietary fibre, g/d                  | 16.3            | 17.9  | 20.5  | 23.5  | 27.3  | 31.2  | 33.9  | 3.07     | 0.47     | 15.3              | 16.6  | 19.0  | 22.2  | 25.5  | 30.0  | 33.1  | 4.50     | 0.91     |
| Sodium, g salt equivalent           | 7.9             | 8.6   | 9.9   | 11.8  | 13.4  | 15.1  | 16.3  | 3.18     | 0.13     | 7.8               | 8.0   | 9.0   | 10.1  | 11.9  | 13.8  | 15.0  | 3.95     | 0.86     |
| Potassium, mg/d                     | 1995            | 2250  | 2590  | 3012  | 3543  | 4175  | 4534  | 3.38     | 0.62     | 1923              | 2245  | 2606  | 2963  | 3488  | 4093  | 4586  | 4.27     | 0.87     |
| <b>Nutrients with AI</b>            |                 |       |       |       |       |       |       |          |          |                   |       |       |       |       |       |       |          |          |
| n-6 PUFA, g/d                       | 6.70            | 7.70  | 9.10  | 11.00 | 12.80 | 14.50 | 15.30 | 6.10     | 0.97     | 6.60              | 7.30  | 8.60  | 10.10 | 11.80 | 13.60 | 14.70 | 3.00     | 0.45     |
| n-3 PUFA, g/d                       | 1.60            | 1.80  | 2.10  | 2.60  | 3.30  | 4.00  | 4.50  | 4.71     | 1.08     | 1.40              | 1.60  | 1.90  | 2.30  | 2.80  | 3.40  | 3.70  | 5.65     | 1.04     |
| Vitamin D, µg/d                     | 5.2             | 5.9   | 7.5   | 9.5   | 11.8  | 14.4  | 16.2  | 2.92     | 0.55     | 4.5               | 5.1   | 6.8   | 8.7   | 10.8  | 13.2  | 16.0  | 4.47     | 1.01     |
| Vitamin E, mg/d                     | 5.6             | 6.1   | 7.7   | 8.7   | 10.3  | 11.9  | 13.4  | 4.56     | 0.90     | 5.7               | 6.1   | 7.4   | 8.7   | 10.4  | 11.9  | 13.5  | 3.06     | 0.58     |
| Vitamin K, µg/d                     | 141             | 163   | 228   | 295   | 394   | 503   | 542   | 3.51     | 0.80     | 136               | 167   | 211   | 285   | 380   | 468   | 554   | 4.73     | 1.11     |
| Pantothenic acid, mg/d              | 4.80            | 5.10  | 5.90  | 6.70  | 7.60  | 8.70  | 9.00  | 4.12     | 0.67     | 4.20              | 4.80  | 5.60  | 6.30  | 7.30  | 8.10  | 8.90  | 4.57     | 0.82     |
| Potassium, mg/d                     | 1995            | 2250  | 2590  | 3012  | 3543  | 4175  | 4534  | 3.38     | 0.62     | 1923              | 2245  | 2606  | 2963  | 3488  | 4093  | 4586  | 4.27     | 0.87     |
| Phosphorus, mg/d                    | 868             | 923   | 1095  | 1208  | 1354  | 1526  | 1632  | 4.80     | 0.56     | 790               | 860   | 975   | 1117  | 1284  | 1459  | 1547  | 3.67     | 0.64     |
| Manganese, mg/d                     | 2.70            | 3.10  | 3.70  | 4.40  | 5.30  | 6.20  | 6.90  | 27.19    | 3.36     | 2.70              | 2.80  | 3.40  | 3.90  | 4.90  | 6.00  | 6.60  | 6.17     | 1.42     |

AI, Adequate Intake; DG, Tentative Dietary Goal for Preventing Lifestyle-related Diseases; DRIs, Dietary Reference Intakes; EAR, Estimated Average Requirement; NE, niacin equivalent; SFA, saturated fatty acid; PUFA, polyunsaturated fatty acid; RAE, retinol active equivalent. <sup>a</sup> Usual intake was estimated using the Multiple Source Method based on 8-day weighed dietary-record data.

**Table S16.** Usual intake distribution of energy and nutrients among Japanese aged 75–79 years <sup>a</sup>.

| Variables                           | Males (N = 100) |       |       |       |       |       |       |          |          | Females (N = 88) |       |       |       |       |       |       |          |          |
|-------------------------------------|-----------------|-------|-------|-------|-------|-------|-------|----------|----------|------------------|-------|-------|-------|-------|-------|-------|----------|----------|
|                                     | 5th             | 10th  | 25th  | 50th  | 75th  | 90th  | 95th  | kurtosis | skewness | 5th              | 10th  | 25th  | 50th  | 75th  | 90th  | 95th  | kurtosis | skewness |
| <b>Energy, kcal/d</b>               | 1675            | 1758  | 1941  | 2254  | 2486  | 2706  | 2927  | 4.46     | 0.71     | 1352             | 1387  | 1562  | 1785  | 2019  | 2153  | 2345  | 3.35     | 0.44     |
| <b>Nutrients without DRI values</b> |                 |       |       |       |       |       |       |          |          |                  |       |       |       |       |       |       |          |          |
| Fat, g/d                            | 41.7            | 46.5  | 54.5  | 65.3  | 75.9  | 88.6  | 103.4 | 8.92     | 1.69     | 34.1             | 37.3  | 46.6  | 55.3  | 65.5  | 72.8  | 77.6  | 2.66     | 0.06     |
| SFA, g/d                            | 11.5            | 12.5  | 14.0  | 17.7  | 20.9  | 25.7  | 29.3  | 5.78     | 1.29     | 9.0              | 9.8   | 12.5  | 15.3  | 18.6  | 21.5  | 22.5  | 2.69     | 0.17     |
| Carbohydrate, g/d                   | 221.3           | 232.4 | 247.4 | 295.9 | 329.8 | 365.2 | 391.2 | 3.31     | 0.63     | 183.9            | 196.2 | 217.7 | 245.8 | 277.8 | 307.0 | 326.6 | 3.72     | 0.69     |
| <b>Nutrients with EAR</b>           |                 |       |       |       |       |       |       |          |          |                  |       |       |       |       |       |       |          |          |
| Protein, g/d                        | 61.2            | 63.7  | 73.7  | 84.9  | 96.1  | 110.2 | 127.1 | 3.86     | 0.69     | 48.7             | 53.4  | 60.8  | 71.3  | 81.3  | 88.9  | 94.6  | 3.05     | 0.26     |
| Vitamin A, µg RAE/d                 | 375             | 403   | 501   | 611   | 733   | 905   | 1094  | 5.14     | 1.27     | 363              | 405   | 514   | 636   | 763   | 940   | 1036  | 5.30     | 1.02     |
| Thiamine, mg/d                      | 0.80            | 0.90  | 0.90  | 1.10  | 1.30  | 1.50  | 1.80  | 3.92     | 0.98     | 0.60             | 0.70  | 0.80  | 0.90  | 1.10  | 1.30  | 1.40  | 3.23     | 0.63     |
| Riboflavin, mg/d                    | 1.10            | 1.10  | 1.30  | 1.50  | 1.70  | 2.00  | 2.30  | 4.31     | 0.99     | 0.90             | 0.90  | 1.10  | 1.30  | 1.60  | 1.80  | 2.00  | 3.45     | 0.41     |
| Niacin, mg NE/d                     | 26.2            | 27.0  | 32.5  | 38.1  | 44.6  | 50.3  | 60.1  | 4.76     | 0.99     | 20.9             | 23.6  | 26.4  | 31.0  | 35.8  | 39.0  | 42.8  | 2.87     | 0.04     |
| Vitamin B-6, mg/d                   | 1.00            | 1.10  | 1.40  | 1.60  | 1.90  | 2.40  | 2.80  | 4.52     | 1.01     | 0.80             | 0.90  | 1.10  | 1.30  | 1.60  | 1.80  | 1.90  | 2.81     | 0.31     |
| Vitamin B-12, µg/d                  | 3.9             | 4.6   | 6.5   | 9.0   | 11.3  | 14.1  | 16.1  | 4.09     | 0.87     | 3.9              | 4.1   | 5.3   | 6.8   | 8.2   | 10.3  | 11.6  | 5.44     | 1.34     |
| Folate, µg/d                        | 265             | 295   | 336   | 408   | 501   | 639   | 736   | 3.69     | 0.85     | 234              | 256   | 315   | 398   | 457   | 568   | 637   | 4.10     | 0.84     |
| Vitamin C, mg/d                     | 66              | 83    | 102   | 134   | 178   | 219   | 261   | 4.17     | 0.94     | 72               | 84    | 107   | 135   | 158   | 204   | 213   | 6.12     | 1.33     |
| Sodium, mg/d                        | 3472            | 3598  | 3972  | 4433  | 5080  | 5791  | 6210  | 9.40     | 1.75     | 2681             | 2803  | 3474  | 3954  | 4635  | 5137  | 5632  | 4.22     | 0.57     |
| Calcium, mg/d                       | 362             | 415   | 500   | 596   | 727   | 950   | 1025  | 3.41     | 0.79     | 350              | 380   | 458   | 562   | 704   | 771   | 854   | 5.00     | 0.76     |
| Magnesium, mg/d                     | 220             | 244   | 276   | 322   | 384   | 448   | 516   | 3.82     | 0.68     | 187              | 208   | 241   | 274   | 326   | 364   | 391   | 3.04     | 0.39     |
| Iron, mg/d                          | 6.4             | 7.2   | 8.0   | 9.5   | 11.0  | 13.0  | 14.3  | 3.84     | 0.65     | 5.6              | 6.0   | 7.4   | 8.3   | 9.4   | 11.5  | 12.6  | 3.13     | 0.50     |
| Zinc, mg/d                          | 6.5             | 7.2   | 8.2   | 9.3   | 10.7  | 12.6  | 13.9  | 3.31     | 0.63     | 5.6              | 6.1   | 7.0   | 8.0   | 8.9   | 10.2  | 10.7  | 3.45     | 0.55     |
| Copper, mg/d                        | 0.90            | 1.00  | 1.10  | 1.40  | 1.60  | 1.90  | 2.00  | 3.32     | 0.51     | 0.80             | 0.90  | 1.00  | 1.20  | 1.30  | 1.50  | 1.70  | 2.84     | 0.43     |
| <b>Nutrients with DG</b>            |                 |       |       |       |       |       |       |          |          |                  |       |       |       |       |       |       |          |          |
| Protein, % energy                   | 12.8            | 13.4  | 14.3  | 15.2  | 16.4  | 17.6  | 18.1  | 2.81     | 0.09     | 13.9             | 14.2  | 14.9  | 15.7  | 16.8  | 17.8  | 18.7  | 3.94     | 0.57     |
| Fat, % energy                       | 20.0            | 20.5  | 23.1  | 25.8  | 29.1  | 33.1  | 34.4  | 3.29     | 0.57     | 21.6             | 22.6  | 25.3  | 27.3  | 29.5  | 31.9  | 32.3  | 3.17     | -0.08    |
| SFA, % energy                       | 5.1             | 5.3   | 6.1   | 6.9   | 8.4   | 9.5   | 10.2  | 2.54     | 0.41     | 5.3              | 5.9   | 6.9   | 7.6   | 8.3   | 9.5   | 10.0  | 3.26     | 0.19     |
| Carbohydrate, % energy              | 41.0            | 44.0  | 48.8  | 53.2  | 58.2  | 60.1  | 62.9  | 2.74     | -0.43    | 48.7             | 50.3  | 52.8  | 56.2  | 59.2  | 62.2  | 63.2  | 3.28     | -0.10    |
| Dietary fibre, g/d                  | 16.0            | 17.3  | 20.9  | 23.3  | 27.1  | 32.7  | 36.7  | 4.22     | 0.87     | 15.5             | 15.8  | 17.9  | 21.1  | 24.7  | 27.6  | 30.1  | 3.21     | 0.54     |
| Sodium, g salt equivalent           | 8.8             | 9.1   | 10.1  | 11.3  | 12.9  | 14.7  | 15.8  | 9.40     | 1.75     | 6.8              | 7.1   | 8.8   | 10.0  | 11.8  | 13.0  | 14.3  | 4.22     | 0.57     |
| Potassium, mg/d                     | 1976            | 2187  | 2634  | 2999  | 3646  | 4424  | 5048  | 4.56     | 1.02     | 1777             | 2073  | 2334  | 2712  | 3319  | 3796  | 4094  | 2.89     | 0.39     |
| <b>Nutrients with AI</b>            |                 |       |       |       |       |       |       |          |          |                  |       |       |       |       |       |       |          |          |
| n-6 PUFA, g/d                       | 5.80            | 7.30  | 9.10  | 10.70 | 12.80 | 15.50 | 18.10 | 4.77     | 0.97     | 6.40             | 6.70  | 7.60  | 8.90  | 10.30 | 11.60 | 12.20 | 2.65     | 0.35     |
| n-3 PUFA, g/d                       | 1.60            | 1.90  | 2.20  | 2.90  | 3.50  | 3.90  | 4.20  | 4.71     | 0.62     | 1.30             | 1.40  | 1.70  | 2.30  | 2.90  | 3.60  | 4.30  | 4.79     | 1.16     |
| Vitamin D, µg/d                     | 5.5             | 6.5   | 9.1   | 11.5  | 14.4  | 17.7  | 19.6  | 4.45     | 0.85     | 4.2              | 5.2   | 6.9   | 8.9   | 11.7  | 15.5  | 17.4  | 3.04     | 0.67     |
| Vitamin E, mg/d                     | 5.4             | 6.0   | 7.3   | 8.5   | 10.5  | 12.2  | 14.4  | 4.53     | 1.05     | 5.3              | 5.6   | 6.4   | 8.0   | 9.5   | 10.7  | 11.1  | 2.55     | 0.39     |
| Vitamin K, µg/d                     | 132             | 140   | 184   | 286   | 393   | 514   | 585   | 3.13     | 0.75     | 147              | 168   | 222   | 276   | 342   | 477   | 520   | 3.50     | 0.86     |
| Pantothenic acid, mg/d              | 4.70            | 4.90  | 5.90  | 6.80  | 7.70  | 9.30  | 10.50 | 7.42     | 1.57     | 4.10             | 4.50  | 5.00  | 6.00  | 6.90  | 7.90  | 8.50  | 3.96     | 0.77     |
| Potassium, mg/d                     | 1976            | 2187  | 2634  | 2999  | 3646  | 4424  | 5048  | 4.56     | 1.02     | 1777             | 2073  | 2334  | 2712  | 3319  | 3796  | 4094  | 2.89     | 0.39     |
| Phosphorus, mg/d                    | 823             | 922   | 1053  | 1221  | 1393  | 1643  | 1840  | 4.12     | 0.75     | 718              | 778   | 902   | 1067  | 1203  | 1370  | 1410  | 3.45     | 0.30     |
| Manganese, mg/d                     | 2.80            | 3.30  | 3.80  | 4.60  | 5.40  | 7.10  | 7.80  | 12.68    | 2.28     | 2.30             | 2.60  | 3.20  | 3.90  | 4.90  | 5.30  | 6.00  | 2.98     | 0.38     |

AI, Adequate Intake; DG, Tentative Dietary Goal for Preventing Lifestyle-related Diseases; DRIs, Dietary Reference Intakes; EAR, Estimated Average Requirement; NE, niacin equivalent; SFA, saturated fatty acid; PUFA, polyunsaturated fatty acid; RAE, retinol active equivalent. <sup>a</sup> Usual intake was estimated using the Multiple Source Method based on 8-day weighed dietary-record data.
